# Supplementary material for: Improved prediction of gene expression through integrating cell signalling models with machine learning
Source: PubMed Central journal article supplement (PMC9356471; doi:10.1186/s12859-022-04787-8), 2022-08-06
Supplement: 12859_2022_4787_MOESM1_ESM.pdf [file 12859_2022_4787_MOESM1_ESM.pdf]

# Improved Prediction of Gene Expression through Integrating Cell Signalling Models with Machine Learning: supplemental document

Nada Altaweraqi<sup>1,2\*</sup> and Ross D. King<sup>3,4,5</sup>

---

*\* Correspondence: Nadaaltaweraqi@postgrad.manchester.ac.uk. <sup>1</sup> Department of Computer Science, University of Manchester, Manchester, UK. Full list of author information is available at the end of the article*

---

supplementary table 1. The accuracy of the first round model.

| Gene     | R2     | Gene     | R2     | Gene     | R2     | Gene     | R2     |
|----------|--------|----------|--------|----------|--------|----------|--------|
| DDR1     | 0.085  | RRAGA    | -0.021 | SDHB     | 0.048  | HES1     | 0.078  |
| RHOA     | 0.018  | SMC4     | 0.318  | GTF2A2   | 0.076  | PSMG1    | 0.199  |
| RNPS1    | 0.044  | NIPSNAP1 | 0.139  | CCNB2    | 0.412  | DDB2     | 0.373  |
| RPS6     | -0.038 | MYBL2    | 0.276  | LIG1     | 0.403  | CCNA2    | 0.437  |
| CSRP1    | -0.044 | ELAVL1   | 0.027  | EBP      | 0.038  | EML3     | 0.028  |
| XBP1     | 0.543  | KIAA0100 | 0.025  | WRB      | 0.155  | PRAF2    | 0.123  |
| SKP1     | 0.007  | TP53     | 0.331  | SYNE2    | -0.04  | MRPL19   | 0.097  |
| CAPN1    | 0.141  | PSME2    | 0.242  | OXCT1    | 0.34   | MNAT1    | -0.062 |
| CTSD     | 0.288  | LBR      | 0.062  | NNT      | 0.132  | RAB4A    | -0.073 |
| MAT2A    | 0.122  | SCCPDH   | 0.125  | GAA      | 0.133  | BCL2     | 0.061  |
| STMN1    | 0.341  | SMARCD2  | 0.079  | SLC37A4  | 0.03   | RFC2     | -0.026 |
| CIRBP    | 0.17   | NET1     | 0.367  | HPRT1    | 0.104  | SLC25A13 | -0.009 |
| PSME1    | 0.254  | HDAC2    | 0.038  | FAH      | 0.1    | MRPL12   | 0.134  |
| PGAM1    | 0.014  | HSPB1    | 0.073  | POP4     | 0.07   | CEBPA    | 0.026  |
| STAT1    | -0.01  | CDC25B   | 0.319  | CDC20    | 0.262  | SLC5A6   | -0.011 |
| GNAS     | -0.023 | ATMIN    | 0.044  | NUP88    | 0.035  | AURKA    | 0.359  |
| HIF1A    | -0.012 | PSRC1    | 0.29   | MSH6     | 0.088  | CCNH     | 0.002  |
| PAICS    | 0.08   | UBE2A    | 0.094  | PIN1     | -0.002 | CDC45    | 0.033  |
| HADH     | 0.257  | COASY    | -0.078 | ETFB     | 0.01   | ENOSF1   | 0.074  |
| SMARCC1  | -0.025 | BIRC5    | 0.532  | CRYZ     | 0.168  | CDK2     | 0.343  |
| PIP4K2B  | 0.014  | ARHGAP1  | 0.246  | UBE2C    | 0.489  | ELOVL6   | 0.492  |
| PFKL     | 0.009  | CPNE3    | 0.034  | LYPLA1   | -0.001 | CREB1    | -0.102 |
| PGRMC1   | 0.048  | NUP62    | 0.087  | TIMELESS | 0.502  | PPIC     | 0.068  |
| MBNL1    | 0.081  | PCM1     | 0.02   | PAN2     | 0.006  | BRCA1    | 0.162  |
| PCNA     | 0.242  | NUP93    | 0.055  | RB1      | 0.068  | CCDC85B  | 0.101  |
| ILK      | 0.051  | PLK1     | 0.162  | TBP      | -0.011 | CCP110   | 0.013  |
| SYPL1    | 0.045  | CDK4     | 0.446  | HAT1     | -0.081 | CDC25A   | 0.03   |
| NUDCD3   | 0.051  | HSD17B10 | 0.134  | S100A4   | 0.195  | NCK1     | -0.1   |
| TOP2A    | 0.543  | CSK      | -0.063 | B4GAT1   | 0.278  | TMEM5    | 0.013  |
| EBNA1BP2 | 0.135  | TCEAL4   | 0.364  | ABCB6    | 0.153  | MELK     | 0.188  |

|         |        |           |        |          |        |         |        |
|---------|--------|-----------|--------|----------|--------|---------|--------|
| SCP2    | 0.114  | USP1      | 0.204  | RFC5     | 0.159  | CCNF    | 0.239  |
| TMEM109 | 0.231  | MPC2      | 0.287  | CDK1     | 0.46   | TCFL5   | 0.014  |
| TRAP1   | 0.026  | DECR1     | 0.19   | TLE1     | 0.052  | ICAM3   | 0.067  |
| SOX4    | 0.143  | ERBB3     | 0.234  | PAFAH1B3 | 0.114  | ATF5    | 0.036  |
| SCRN1   | 0.087  | PRSS23    | 0.465  | DCK      | 0.167  | CCNE2   | -0.011 |
| NFKBIA  | 0.215  | IKBKAP    | -0.035 | DYNLT3   | -0.036 | LSM6    | 0.2    |
| G3BP1   | -0.001 | GALE      | 0.509  | BAMBI    | 0.354  | ITGAE   | 0.069  |
| RPA1    | 0.117  | PRKCD     | 0.007  | SLC35A1  | 0.4    | SGCB    | -0.036 |
| MCM3    | 0.378  | S100A13   | 0.445  | ITGB1BP1 | -0.009 | PLS1    | 0.019  |
| SMC1A   | -0.025 | NRIP1     | 0.244  | TIMM17B  | 0.025  | PCMT1   | 0.192  |
| PWP1    | -0.04  | EAPP      | 0.024  | UGDH     | 0.094  | INPP4B  | 0.07   |
| ICMT    | 0.208  | POLR2K    | 0.108  | EZH2     | 0.141  | CHEK1   | 0.047  |
| RUVBL1  | 0.205  | NRAS      | 0.029  | MYCBP    | 0.212  | DAG1    | 0.111  |
| GHR     | 0.168  | EED       | 0.073  | ASAH1    | 0.034  | ZDHHC6  | 0.02   |
| SCYL3   | -0.013 | GATA3     | 0.353  | SMARCA4  | 0.074  | TIMM9   | 0.123  |
| POLG2   | -0.073 | CETN3     | 0.002  | ATP5S    | 0.142  | GMNN    | 0.216  |
| NOLC1   | 0.075  | TGFB3     | 0.254  | PARP2    | 0.01   | CDCA4   | 0.256  |
| POLE2   | 0.344  | HIST1H2BK | 0.22   | AKR7A2   | 0.238  | NENF    | 0.114  |
| RAD51C  | 0.116  | ANXA7     | 0.03   | SPDEF    | 0.543  | DNAJC15 | -0.015 |
| KIF14   | 0.079  | PUF60     | -0.009 | CCNB1    | 0.188  | HEBP1   | 0.193  |
| SLC35A3 | 0.003  | CFLAR     | 0.018  | ERBB2    | -0.015 | CD320   | 0.031  |
| AKT1    | 0.253  | RPL39L    | -0.03  | VDAC1    | -0.095 | CHMP4A  | 0.086  |
| MUC1    | 0.199  | CHEK2     | 0.187  | GAPDH    | -0.086 | HEATR1  | -0.11  |
| CASP2   | -0.117 | HMG20B    | 0.097  | CNDP2    | 0.082  | CISD1   | 0.238  |
| PARP1   | 0.176  | TPM1      | 0.162  | ADI1     | 0.161  | SUV39H1 | 0.178  |
| FDFT1   | 0.095  | BDH1      | 0.482  | TMEM50A  | 0.198  | VPS28   | -0.053 |
| CCND1   | 0.042  | LSM5      | 0.112  | HACD3    | 0.031  | KIF20A  | 0.346  |
| OXA1L   | -0.092 | TXNDC9    | -0.092 | YKT6     | 0.437  | METRNL  | 0.029  |
| CDC42   | -0.018 | HN1L      | 0.178  | BZW2     | -0.026 | LAGE3   | 0.285  |
| ADH5    | -0.053 | ZMIZ1     | -0.068 | EVL      | 0.036  | PXMP2   | 0.274  |
| CYCS    | -0.017 | PDS5A     | -0.013 | MIF      | 0.156  | AMDHD2  | 0.155  |
| COPS7A  | 0.046  | XPO7      | -0.001 | IARS2    | 0.285  | FBXO11  | -0.1   |
| GLOD4   | 0.09   | COG4      | 0.014  | KLHDC2   | 0.205  | MTERF3  | 0.217  |
| DLD     | -0.068 | TMEM97    | 0.071  | STUB1    | 0.136  | PSMD10  | -0.023 |
| IFRD2   | 0.034  | TFDP1     | 0.22   | ENOPH1   | -0.054 | TSEN2   | 0.089  |
| TSPAN6  | 0.012  | KAT6B     | 0.005  | MRPS2    | -0.078 | PRR7    | 0.105  |
| CDKN1B  | -0.009 | ADO       | -0.03  | NUP85    | 0.17   | GTPBP8  | -0.077 |
| PRPF4   | -0.031 | JADE2     | 0.179  | FIS1     | 0.012  | DENND2D | -0.043 |
| CBR1    | -0.016 | PCCB      | 0.077  | NUSAP1   | 0.25   | ARPP19  | -0.1   |
| NR2F6   | 0.212  | KIAA1033  | 0.062  | MRPS16   | 0.068  | ATG3    | -0.042 |
| TSPAN4  | 0.38   | RRP1B     | 0.047  | NPDC1    | -0.004 | WDR61   | 0.091  |
| PSIP1   | 0.035  | THAP11    | -0.008 | DERA     | 0.11   | CANT1   | -0.021 |
| AURKB   | 0.284  | C2CD5     | 0.26   | UBR7     | 0.102  | FAM63A  | 0.095  |
| RPA3    | 0.252  | POLR2I    | -0.047 | ISOC1    | 0.188  | ATF1    | 0.028  |
| HDGFRP3 | 0.061  | RPIA      | 0.289  | CCDC92   | 0.09   | TSTA3   | 0.092  |
| RRS1    | 0.036  | PLCB3     | 0.161  | SCAND1   | 0.202  |         |        |

supplementary table 2. The accuracy of the seven models is illustrated as follows: cn is the common neighbour model, lpi is local path index model, ent is the relative-entropy model, loc is the locally linear embedding model, lgin is the laplacian eigenmaps embedding model, n2v is the node2vec model, and depwlc is the deepwalk model.

| Gene     | baseline      | cn     | ib            | ent           | locallylinear | lap <sub>egn</sub> | n2v           | deepwalk      | stacking      |
|----------|---------------|--------|---------------|---------------|---------------|--------------------|---------------|---------------|---------------|
| DDR1     | 0.45          | 0.4532 | 0.4516        | 0.4519        | 0.4517        | 0.4527             | 0.4515        | 0.4518        | <b>0.4538</b> |
| RHOA     | 0.4643        | 0.4636 | 0.4633        | 0.4637        | 0.4652        | 0.4636             | 0.4648        | 0.4622        | <b>0.4662</b> |
| RNPS1    | 0.4           | 0.3988 | 0.4021        | <b>0.4043</b> | 0.4001        | 0.4007             | 0.4006        | 0.4015        | 0.4036        |
| RPS6     | <b>0.4167</b> | 0.4145 | 0.4146        | 0.4146        | 0.4128        | 0.4139             | <b>0.4167</b> | 0.4162        | <b>0.4167</b> |
| CSRP1    | 0.1946        | 0.1933 | 0.193         | 0.1923        | 0.1939        | 0.1935             | 0.1935        | <b>0.1969</b> | 0.1964        |
| XBP1     | 0.7518        | 0.7516 | 0.7511        | 0.7518        | 0.7517        | 0.7515             | 0.7502        | 0.7512        | <b>0.7526</b> |
| SKP1     | 0.4822        | 0.4826 | 0.4829        | 0.483         | 0.4838        | 0.4834             | 0.4812        | 0.4824        | <b>0.4846</b> |
| CAPN1    | 0.4592        | 0.4585 | 0.4595        | 0.4593        | 0.4601        | 0.458              | 0.4582        | 0.4581        | <b>0.4627</b> |
| CTSD     | 0.6112        | 0.6114 | 0.6114        | 0.6122        | 0.6104        | 0.6114             | 0.6114        | 0.6107        | <b>0.613</b>  |
| MAT2A    | 0.4682        | 0.4695 | 0.4717        | 0.4698        | 0.4718        | 0.471              | 0.4701        | 0.4718        | <b>0.4725</b> |
| STMN1    | 0.676         | 0.6759 | 0.677         | 0.677         | 0.6773        | 0.6776             | 0.6762        | 0.6771        | <b>0.678</b>  |
| CIRBP    | <b>0.5163</b> | 0.5138 | 0.5141        | 0.5127        | 0.5119        | 0.5135             | 0.5132        | 0.5121        | 0.5155        |
| PSME1    | 0.6093        | 0.6103 | 0.6111        | 0.6116        | 0.611         | 0.6107             | 0.6115        | 0.6111        | <b>0.6124</b> |
| PGAM1    | 0.2458        | 0.2486 | 0.247         | 0.2484        | 0.248         | 0.2479             | 0.2488        | 0.2454        | <b>0.2508</b> |
| STAT1    | 0.2715        | 0.2731 | 0.2729        | <b>0.2743</b> | 0.2673        | 0.2689             | 0.2713        | 0.2674        | 0.2737        |
| GNAS     | 0.2093        | 0.2114 | 0.2093        | 0.2094        | 0.2093        | 0.2084             | 0.2111        | 0.21          | <b>0.2122</b> |
| HIF1A    | 0.3849        | 0.3884 | 0.3889        | 0.3895        | 0.3876        | 0.3894             | 0.3869        | 0.3864        | <b>0.3901</b> |
| PAICS    | 0.5619        | 0.5634 | 0.5626        | 0.5641        | 0.5621        | 0.5646             | 0.563         | 0.5632        | <b>0.5651</b> |
| HADH     | 0.5623        | 0.562  | 0.5628        | 0.5633        | 0.5626        | 0.5631             | 0.5619        | 0.5637        | <b>0.5639</b> |
| SMARCC1  | 0.4122        | 0.4144 | 0.4134        | 0.4149        | 0.4149        | 0.4169             | 0.4141        | <b>0.417</b>  | 0.4169        |
| PIP4K2B  | 0.3865        | 0.3904 | 0.3913        | <b>0.3925</b> | 0.3894        | 0.3922             | 0.3899        | 0.3882        | 0.3924        |
| PFKL     | 0.2845        | 0.2866 | 0.2883        | 0.2868        | 0.287         | 0.2868             | 0.286         | <b>0.2887</b> | 0.2886        |
| PGRMC1   | 0.5239        | 0.5243 | 0.5252        | 0.5244        | 0.5254        | 0.5243             | 0.5255        | 0.5242        | <b>0.527</b>  |
| MBNL1    | 0.4416        | 0.4401 | <b>0.4441</b> | 0.4425        | 0.4436        | 0.444              | 0.4391        | 0.4436        | 0.444         |
| PCNA     | 0.4139        | 0.4114 | 0.4113        | 0.412         | 0.4121        | 0.413              | 0.4138        | 0.4112        | <b>0.4145</b> |
| ILK      | 0.4552        | 0.4547 | 0.4528        | 0.4515        | 0.4539        | 0.453              | 0.4545        | 0.454         | <b>0.4554</b> |
| SYPL1    | 0.4451        | 0.4451 | 0.4476        | 0.4477        | 0.4479        | 0.4455             | 0.4448        | 0.4482        | <b>0.4484</b> |
| NUDCD3   | <b>0.4956</b> | 0.4928 | 0.4936        | 0.4912        | 0.4935        | 0.4949             | 0.4932        | 0.4926        | 0.4951        |
| TOP2A    | 0.7958        | 0.7948 | 0.7956        | 0.7948        | <b>0.7966</b> | 0.7949             | 0.7946        | 0.795         | 0.7964        |
| EBNA1BP2 | 0.5359        | 0.5367 | 0.5368        | 0.5363        | 0.5377        | 0.5364             | 0.5366        | 0.537         | <b>0.5389</b> |
| SCP2     | 0.4834        | 0.4861 | 0.4881        | 0.4871        | 0.4883        | 0.4875             | 0.485         | 0.4877        | <b>0.4884</b> |
| TMEM109  | 0.5836        | 0.5846 | 0.5828        | 0.5815        | 0.5837        | 0.5808             | 0.5835        | 0.5833        | <b>0.5849</b> |
| TRAP1    | 0.4347        | 0.4346 | 0.4326        | 0.4349        | <b>0.4366</b> | 0.4342             | 0.4353        | 0.4359        | <b>0.4366</b> |
| SOX4     | 0.5297        | 0.5311 | 0.5313        | 0.5318        | <b>0.535</b>  | 0.5318             | 0.5327        | 0.5314        | 0.5339        |
| SCRN1    | 0.4654        | 0.4625 | 0.4625        | 0.4626        | 0.4639        | 0.4628             | 0.4648        | 0.4647        | <b>0.4656</b> |
| NFKBIA   | 0.4707        | 0.472  | 0.4689        | 0.4711        | 0.4702        | 0.468              | <b>0.4729</b> | 0.4701        | <b>0.4729</b> |
| G3BP1    | 0.2792        | 0.2768 | 0.2787        | 0.2787        | 0.2739        | <b>0.2814</b>      | 0.2769        | 0.2746        | 0.28          |
| RPA1     | 0.5569        | 0.5566 | 0.555         | 0.5536        | 0.5565        | 0.5555             | 0.5564        | 0.5575        | <b>0.5581</b> |
| MCM3     | 0.6614        | 0.6621 | 0.6619        | 0.6608        | 0.6622        | 0.6621             | 0.6627        | 0.6607        | <b>0.6631</b> |

|          |               |        |              |        |               |        |               |               |               |
|----------|---------------|--------|--------------|--------|---------------|--------|---------------|---------------|---------------|
| SMC1A    | 0.1879        | 0.1896 | 0.1931       | 0.1926 | 0.1921        | 0.1915 | 0.1895        | <b>0.1942</b> | 0.1938        |
| PWP1     | 0.3422        | 0.3393 | 0.3403       | 0.3429 | <b>0.343</b>  | 0.3405 | 0.3389        | 0.3406        | <b>0.343</b>  |
| ICMT     | 0.5028        | 0.5027 | 0.5034       | 0.5023 | 0.5022        | 0.5015 | 0.5018        | 0.5031        | <b>0.5042</b> |
| RUVBL1   | 0.5557        | 0.5571 | 0.5564       | 0.5574 | 0.555         | 0.5567 | 0.5551        | 0.5575        | <b>0.5581</b> |
| RRAGA    | 0.4428        | 0.4445 | 0.4458       | 0.4461 | 0.4457        | 0.4469 | 0.445         | 0.4425        | <b>0.4471</b> |
| SMC4     | 0.6742        | 0.6743 | 0.6758       | 0.6752 | 0.6747        | 0.6747 | 0.6742        | 0.6751        | <b>0.6763</b> |
| NIPSNAP1 | 0.5525        | 0.5531 | <b>0.556</b> | 0.5541 | 0.5543        | 0.5523 | 0.5531        | 0.554         | <b>0.556</b>  |
| MYBL2    | 0.5776        | 0.5772 | 0.5784       | 0.5797 | <b>0.581</b>  | 0.58   | 0.579         | 0.579         | 0.5808        |
| ELAVL1   | 0.4433        | 0.4446 | 0.4426       | 0.4433 | 0.442         | 0.4431 | 0.4431        | 0.4407        | <b>0.4452</b> |
| KIAA0100 | 0.4004        | 0.3996 | 0.3992       | 0.4009 | <b>0.4034</b> | 0.4    | 0.4011        | 0.401         | 0.4031        |
| TP53     | 0.5886        | 0.59   | 0.5923       | 0.5911 | <b>0.5927</b> | 0.5922 | 0.5884        | 0.5924        | <b>0.5927</b> |
| PSME2    | 0.5581        | 0.5575 | 0.5563       | 0.5562 | 0.5588        | 0.5583 | <b>0.5604</b> | 0.5575        | 0.5596        |
| LBR      | 0.5088        | 0.5101 | 0.5081       | 0.509  | 0.5099        | 0.51   | 0.5102        | 0.5101        | <b>0.5113</b> |
| SCCPDH   | 0.483         | 0.4821 | 0.4826       | 0.4841 | 0.4857        | 0.4835 | 0.4824        | 0.4848        | <b>0.4859</b> |
| SMARCD2  | 0.4616        | 0.4631 | 0.4627       | 0.4627 | <b>0.4652</b> | 0.4633 | 0.4601        | 0.4614        | 0.4645        |
| NET1     | 0.6266        | 0.6274 | 0.6264       | 0.6256 | 0.6262        | 0.6267 | 0.6273        | 0.6265        | <b>0.6278</b> |
| HDAC2    | 0.5316        | 0.532  | 0.5327       | 0.533  | 0.5337        | 0.5335 | 0.5332        | <b>0.5354</b> | 0.5352        |
| HSPB1    | <b>0.4742</b> | 0.4707 | 0.4694       | 0.4706 | 0.4726        | 0.471  | 0.4732        | 0.4725        | 0.4737        |
| CDC25B   | 0.5267        | 0.5273 | 0.5265       | 0.5279 | <b>0.5293</b> | 0.5283 | 0.5265        | 0.5283        | 0.5291        |
| ATMIN    | 0.483         | 0.483  | 0.4849       | 0.4824 | 0.4838        | 0.4817 | 0.4838        | 0.4817        | <b>0.4854</b> |
| PSRC1    | 0.5967        | 0.5962 | 0.5966       | 0.5955 | 0.5982        | 0.5972 | 0.5968        | 0.5985        | <b>0.5986</b> |
| UBE2A    | 0.4857        | 0.4837 | 0.4835       | 0.4842 | 0.4838        | 0.4822 | 0.484         | 0.4824        | <b>0.4862</b> |
| COASY    | 0.4036        | 0.4032 | 0.4045       | 0.4052 | 0.4025        | 0.4042 | 0.4034        | 0.403         | <b>0.4055</b> |
| BIRC5    | 0.7816        | 0.7814 | 0.7809       | 0.7826 | 0.7823        | 0.7825 | 0.7811        | 0.7821        | <b>0.7829</b> |
| ARHGAP1  | 0.6153        | 0.6143 | 0.6141       | 0.6144 | 0.6143        | 0.6153 | 0.6142        | 0.6145        | <b>0.6161</b> |
| CPNE3    | 0.4638        | 0.4657 | 0.4655       | 0.465  | 0.4661        | 0.4667 | 0.467         | 0.4646        | <b>0.4684</b> |
| NUP62    | 0.536         | 0.5364 | 0.5373       | 0.5368 | <b>0.5392</b> | 0.5359 | 0.5345        | 0.5388        | 0.5387        |
| PCM1     | 0.4049        | 0.4026 | 0.4068       | 0.4051 | 0.4067        | 0.4069 | 0.4042        | 0.404         | <b>0.4074</b> |
| NUP93    | <b>0.4355</b> | 0.4336 | 0.4275       | 0.4284 | 0.4315        | 0.431  | 0.4346        | 0.4317        | 0.4347        |
| PLK1     | 0.3966        | 0.3959 | 0.3959       | 0.3954 | 0.3962        | 0.3973 | 0.3969        | 0.397         | <b>0.398</b>  |
| CDK4     | 0.6708        | 0.67   | 0.67         | 0.6702 | 0.669         | 0.6698 | 0.6699        | 0.6695        | <b>0.6711</b> |
| HSD17B10 | 0.5422        | 0.5426 | 0.5407       | 0.5419 | 0.5427        | 0.54   | 0.54          | 0.5409        | <b>0.5434</b> |
| CSK      | 0.4011        | 0.4026 | 0.4022       | 0.4015 | 0.4019        | 0.4039 | 0.4017        | 0.4006        | <b>0.4044</b> |
| TCEAL4   | 0.651         | 0.6514 | 0.6515       | 0.6506 | 0.6517        | 0.6514 | 0.6515        | 0.6518        | <b>0.6525</b> |
| USP1     | 0.585         | 0.5839 | 0.5833       | 0.5844 | 0.5841        | 0.5843 | 0.5838        | <b>0.586</b>  | 0.5858        |
| MPC2     | 0.6136        | 0.6123 | 0.6156       | 0.6146 | 0.6151        | 0.6138 | 0.613         | <b>0.6162</b> | 0.6159        |
| DECR1    | 0.5276        | 0.5292 | 0.5283       | 0.5287 | 0.5281        | 0.5278 | 0.5288        | 0.5267        | <b>0.5303</b> |
| ERBB3    | 0.4996        | 0.5002 | 0.4997       | 0.5008 | 0.4995        | 0.5005 | 0.4997        | 0.5009        | <b>0.502</b>  |
| PRSS23   | 0.6763        | 0.6775 | 0.676        | 0.6768 | <b>0.6794</b> | 0.6782 | 0.6767        | 0.6787        | 0.6791        |
| IKBKAP   | 0.3325        | 0.3346 | 0.332        | 0.3339 | 0.3352        | 0.3342 | 0.3336        | 0.3314        | <b>0.3361</b> |
| GALE     | 0.7267        | 0.7261 | 0.7262       | 0.7258 | 0.7271        | 0.7267 | 0.7272        | 0.7259        | <b>0.7279</b> |
| PRKCD    | 0.4411        | 0.4405 | 0.4401       | 0.4411 | 0.4393        | 0.4408 | 0.4404        | 0.4399        | <b>0.4424</b> |
| S100A13  | 0.7024        | 0.7026 | 0.703        | 0.7043 | 0.7043        | 0.7036 | 0.7034        | 0.7044        | <b>0.7046</b> |
| NRIP1    | 0.4643        | 0.462  | 0.4636       | 0.4653 | 0.4653        | 0.4646 | 0.4617        | 0.4643        | <b>0.4664</b> |
| EAPP     | 0.2905        | 0.2906 | 0.2923       | 0.293  | 0.292         | 0.291  | 0.2927        | 0.2893        | <b>0.2941</b> |
| POLR2K   | 0.5375        | 0.5371 | 0.536        | 0.5369 | 0.5364        | 0.5385 | 0.5356        | 0.5363        | <b>0.5387</b> |
| NRAS     | 0.5165        | 0.5161 | 0.5188       | 0.5178 | 0.5191        | 0.5176 | 0.5177        | 0.5167        | <b>0.5198</b> |

|          |               |        |               |               |               |               |              |               |               |
|----------|---------------|--------|---------------|---------------|---------------|---------------|--------------|---------------|---------------|
| SDHB     | 0.5161        | 0.5161 | 0.5192        | 0.5176        | 0.5175        | 0.5187        | 0.5157       | 0.5176        | <b>0.5196</b> |
| GTF2A2   | 0.4871        | 0.487  | 0.4874        | 0.4872        | 0.4893        | 0.4891        | 0.4876       | 0.4868        | <b>0.4905</b> |
| CCNB2    | 0.6618        | 0.6644 | 0.6629        | 0.6641        | 0.6632        | 0.6644        | 0.6632       | 0.6629        | <b>0.6651</b> |
| LIG1     | 0.671         | 0.6715 | 0.672         | 0.6715        | 0.6721        | 0.6715        | 0.671        | 0.6708        | <b>0.6729</b> |
| EBP      | 0.4182        | 0.4159 | 0.4161        | 0.4171        | 0.4161        | 0.4177        | 0.4165       | 0.4152        | <b>0.4191</b> |
| WRB      | 0.5282        | 0.5294 | 0.53          | 0.5293        | 0.5307        | 0.5304        | 0.5288       | <b>0.5322</b> | 0.5312        |
| SYNE2    | 0.3888        | 0.3883 | 0.3903        | 0.3901        | 0.3889        | 0.39          | 0.3891       | 0.3884        | <b>0.3914</b> |
| OXCT1    | 0.6251        | 0.6266 | 0.6249        | 0.6246        | 0.6263        | 0.6256        | 0.6256       | 0.6258        | <b>0.6268</b> |
| NNT      | 0.4925        | 0.4908 | 0.4909        | 0.4911        | 0.4928        | 0.4919        | 0.4921       | 0.4916        | <b>0.4939</b> |
| GAA      | 0.5445        | 0.5456 | 0.545         | 0.5449        | 0.5441        | 0.546         | 0.5453       | 0.5447        | <b>0.5471</b> |
| SLC37A4  | 0.4011        | 0.4023 | 0.4009        | 0.398         | 0.3999        | 0.4019        | 0.4023       | <b>0.403</b>  | <b>0.403</b>  |
| HPRT1    | 0.4113        | 0.4112 | 0.4107        | 0.4131        | 0.4136        | 0.4127        | 0.4106       | 0.4121        | <b>0.4139</b> |
| FAH      | 0.4888        | 0.4882 | 0.4877        | 0.4887        | 0.4891        | 0.4887        | 0.4896       | 0.4903        | <b>0.4914</b> |
| POP4     | 0.5105        | 0.5122 | 0.5111        | 0.5096        | 0.512         | 0.511         | 0.5113       | 0.513         | <b>0.5132</b> |
| CDC20    | 0.5349        | 0.5357 | 0.535         | 0.536         | <b>0.5377</b> | 0.5368        | 0.5363       | 0.5365        | <b>0.5377</b> |
| NUP88    | 0.4804        | 0.479  | 0.4772        | 0.4769        | 0.4804        | 0.4791        | 0.4812       | <b>0.4818</b> | 0.4813        |
| MSH6     | 0.4968        | 0.496  | 0.497         | 0.4976        | 0.4971        | 0.4982        | 0.4971       | 0.4958        | <b>0.4988</b> |
| PIN1     | 0.3268        | 0.3296 | 0.3306        | 0.3283        | 0.3301        | 0.3305        | 0.3303       | <b>0.332</b>  | 0.3318        |
| ETFB     | 0.4607        | 0.4609 | 0.4634        | 0.4638        | 0.46          | <b>0.4645</b> | 0.4605       | 0.4636        | 0.4642        |
| CRYZ     | 0.5211        | 0.5216 | 0.5237        | <b>0.5246</b> | 0.5226        | 0.523         | 0.5225       | 0.5231        | 0.5244        |
| UBE2C    | 0.751         | 0.751  | 0.7524        | 0.7524        | <b>0.7538</b> | 0.7514        | 0.752        | 0.7512        | 0.7533        |
| LYPLA1   | 0.2788        | 0.2769 | 0.2799        | 0.2776        | <b>0.2818</b> | 0.2806        | 0.2765       | 0.2791        | 0.2812        |
| TIMELESS | <b>0.7269</b> | 0.7257 | 0.7244        | 0.7242        | 0.7258        | 0.7247        | 0.7264       | 0.7233        | 0.7265        |
| PAN2     | 0.2264        | 0.2277 | 0.2297        | 0.2256        | 0.2268        | <b>0.2329</b> | 0.2289       | 0.2283        | 0.231         |
| RB1      | 0.4562        | 0.4552 | 0.4565        | 0.4575        | 0.4571        | 0.4567        | 0.4554       | 0.4571        | <b>0.4586</b> |
| TBP      | 0.4453        | 0.4462 | 0.4446        | 0.4447        | 0.4469        | 0.4442        | 0.4464       | 0.4468        | <b>0.4476</b> |
| HAT1     | 0.1991        | 0.2    | 0.202         | 0.2022        | 0.2002        | 0.1971        | 0.2022       | 0.1991        | <b>0.2031</b> |
| S100A4   | 0.5006        | 0.5005 | 0.4998        | 0.5018        | <b>0.503</b>  | 0.5022        | 0.5011       | 0.5016        | 0.5029        |
| B4GAT1   | 0.61          | 0.6096 | <b>0.6135</b> | 0.6116        | 0.6095        | 0.6121        | 0.6098       | 0.6121        | 0.6124        |
| ABCB6    | 0.4977        | 0.4975 | 0.4979        | 0.5002        | 0.5012        | <b>0.5018</b> | 0.4973       | 0.5012        | 0.5017        |
| RFC5     | 0.4189        | 0.4213 | 0.422         | 0.4226        | 0.4229        | 0.4224        | 0.4202       | 0.4223        | <b>0.4232</b> |
| CDK1     | 0.6971        | 0.6971 | 0.697         | 0.697         | 0.6971        | 0.6974        | 0.6963       | 0.6977        | <b>0.6984</b> |
| TLE1     | 0.3466        | 0.3472 | 0.3487        | 0.3493        | 0.3509        | 0.3484        | 0.3492       | 0.3495        | <b>0.3511</b> |
| PAFAH1B3 | 0.5619        | 0.5607 | 0.5606        | 0.5609        | 0.5606        | 0.5611        | 0.5609       | 0.5623        | <b>0.5629</b> |
| DCK      | 0.4165        | 0.4176 | 0.4187        | 0.4189        | 0.4158        | 0.4184        | 0.4186       | 0.4174        | <b>0.4197</b> |
| DYNLT3   | 0.3763        | 0.3784 | 0.377         | 0.3725        | 0.3763        | 0.3748        | 0.378        | <b>0.3787</b> | <b>0.3787</b> |
| BAMBI    | 0.5989        | 0.6003 | 0.5989        | 0.5996        | <b>0.6024</b> | 0.5994        | 0.6007       | 0.601         | 0.6018        |
| SLC35A1  | 0.673         | 0.6743 | 0.6753        | 0.6758        | 0.6755        | 0.6755        | 0.6746       | 0.6754        | <b>0.6762</b> |
| ITGB1BP1 | 0.1526        | 0.1527 | <b>0.1585</b> | 0.1554        | 0.1534        | 0.1529        | 0.1557       | 0.1513        | 0.1565        |
| TIMM17B  | 0.3699        | 0.371  | 0.3745        | 0.3745        | 0.3728        | <b>0.3751</b> | 0.3734       | 0.3708        | 0.3749        |
| UGDH     | 0.2253        | 0.2263 | 0.2262        | 0.2245        | 0.2289        | <b>0.2296</b> | 0.2231       | 0.2264        | 0.229         |
| EZH2     | 0.4902        | 0.4907 | 0.49          | 0.4895        | 0.4881        | 0.489         | <b>0.492</b> | 0.4913        | 0.4919        |
| MYCBP    | 0.5828        | 0.5823 | 0.5831        | 0.5836        | 0.5837        | 0.5825        | 0.5819       | 0.5837        | <b>0.5847</b> |
| HES1     | 0.4417        | 0.4432 | 0.4437        | 0.4411        | <b>0.4455</b> | 0.4416        | 0.4412       | 0.4443        | 0.4452        |
| PSMG1    | 0.518         | 0.5205 | 0.5197        | 0.522         | 0.5214        | 0.5222        | 0.5188       | 0.5222        | <b>0.5224</b> |
| DDB2     | 0.6351        | 0.6347 | 0.6324        | 0.6343        | <b>0.6361</b> | 0.6325        | 0.6351       | 0.6339        | 0.6359        |
| CCNA2    | 0.7343        | 0.7343 | 0.7339        | 0.7332        | <b>0.7354</b> | 0.7332        | 0.7344       | 0.7348        | 0.7352        |

|          |               |        |               |               |               |               |               |               |               |
|----------|---------------|--------|---------------|---------------|---------------|---------------|---------------|---------------|---------------|
| EML3     | 0.4451        | 0.4439 | <b>0.4479</b> | 0.4454        | 0.4462        | 0.4449        | 0.4438        | 0.4436        | 0.4475        |
| PRAF2    | 0.5112        | 0.5123 | 0.5137        | 0.5136        | 0.5143        | 0.5128        | 0.5109        | 0.5124        | <b>0.5147</b> |
| MRPL19   | 0.4781        | 0.4782 | 0.4777        | 0.4797        | 0.4789        | 0.4797        | 0.4786        | 0.4782        | <b>0.4802</b> |
| MNAT1    | 0.3133        | 0.3149 | 0.3136        | 0.315         | 0.3153        | 0.3144        | 0.3151        | <b>0.3168</b> | 0.3165        |
| RAB4A    | 0.3676        | 0.3711 | 0.369         | 0.3697        | 0.3682        | 0.3692        | 0.3719        | 0.3706        | <b>0.3721</b> |
| BCL2     | 0.4264        | 0.4259 | 0.4286        | 0.4265        | 0.4266        | 0.4287        | 0.4263        | <b>0.4298</b> | 0.4292        |
| RFC2     | 0.3452        | 0.3429 | 0.3434        | 0.3417        | <b>0.3466</b> | 0.3439        | 0.3448        | 0.3447        | 0.3463        |
| SLC25A13 | 0.2891        | 0.2882 | 0.2884        | <b>0.2908</b> | 0.2885        | 0.2854        | 0.2877        | 0.2896        | 0.2906        |
| MRPL12   | 0.5619        | 0.5623 | 0.5618        | 0.5602        | 0.563         | 0.5621        | 0.5636        | 0.5616        | <b>0.5641</b> |
| CEBPA    | 0.4241        | 0.4251 | 0.4274        | 0.4287        | 0.429         | 0.4288        | 0.4269        | 0.4286        | <b>0.4297</b> |
| SLC5A6   | 0.2991        | 0.2976 | 0.3005        | 0.2998        | 0.2971        | 0.2978        | 0.2993        | 0.3002        | <b>0.3013</b> |
| AURKA    | 0.6638        | 0.6641 | 0.6651        | <b>0.6663</b> | 0.6653        | 0.6635        | 0.6644        | 0.6629        | 0.6659        |
| CCNH     | 0.4035        | 0.4004 | 0.4032        | 0.4044        | 0.4041        | 0.4058        | 0.404         | <b>0.4082</b> | 0.4066        |
| CDC45    | 0.2986        | 0.3022 | 0.3001        | 0.2987        | 0.3009        | 0.3           | 0.3016        | 0.2985        | <b>0.3028</b> |
| ENOSF1   | 0.4783        | 0.4804 | 0.4807        | 0.4811        | 0.4821        | 0.4805        | 0.4801        | <b>0.4831</b> | 0.4823        |
| CDK2     | 0.6066        | 0.6065 | 0.6067        | 0.6067        | 0.6052        | <b>0.6082</b> | 0.6067        | 0.6067        | 0.6081        |
| ELOVL6   | 0.7138        | 0.714  | 0.7129        | 0.7128        | 0.7138        | 0.7112        | 0.7124        | 0.7132        | <b>0.7147</b> |
| CREB1    | 0.1637        | 0.1672 | 0.1681        | 0.17          | 0.166         | 0.1699        | 0.1685        | 0.1676        | <b>0.1701</b> |
| PPIC     | 0.414         | 0.4145 | 0.4123        | 0.4137        | 0.4131        | 0.4134        | 0.4127        | 0.4148        | <b>0.4157</b> |
| BRCA1    | 0.4585        | 0.4601 | 0.4592        | 0.4598        | 0.4596        | 0.4608        | 0.4612        | 0.4584        | <b>0.4615</b> |
| CCDC85B  | 0.3908        | 0.3912 | 0.3921        | 0.3931        | 0.3931        | 0.3937        | 0.3917        | 0.3938        | <b>0.3947</b> |
| CCP110   | 0.3567        | 0.359  | 0.3604        | <b>0.3616</b> | 0.3584        | 0.3595        | 0.3587        | 0.3589        | 0.3613        |
| CDC25A   | 0.4217        | 0.4217 | 0.4224        | <b>0.4253</b> | 0.4233        | 0.4229        | 0.4207        | 0.4221        | 0.425         |
| NCK1     | 0.2086        | 0.2097 | 0.2069        | 0.206         | 0.2083        | 0.2055        | 0.2082        | 0.2073        | <b>0.2106</b> |
| TMEM5    | 0.3733        | 0.3737 | 0.3726        | 0.3752        | 0.3738        | 0.3729        | 0.3746        | 0.3743        | <b>0.376</b>  |
| MELK     | <b>0.2727</b> | 0.2695 | 0.2689        | 0.2689        | 0.2722        | 0.2651        | 0.272         | 0.2705        | 0.272         |
| CCNF     | 0.5626        | 0.5636 | 0.5615        | 0.5628        | 0.5643        | 0.5634        | 0.5645        | 0.5634        | <b>0.5649</b> |
| TCFL5    | 0.3565        | 0.3545 | 0.3564        | 0.3558        | 0.3563        | 0.3562        | 0.357         | <b>0.359</b>  | 0.3587        |
| ICAM3    | 0.5135        | 0.5141 | 0.5145        | 0.5152        | 0.5134        | 0.5141        | 0.5147        | 0.5124        | <b>0.5162</b> |
| ATF5     | 0.3238        | 0.3225 | 0.3216        | 0.3221        | 0.3224        | 0.3241        | 0.323         | 0.3241        | <b>0.325</b>  |
| CCNE2    | 0.2928        | 0.2921 | 0.289         | 0.2929        | 0.2927        | 0.2941        | 0.2949        | 0.291         | <b>0.2951</b> |
| LSM6     | 0.5487        | 0.5495 | 0.5494        | 0.55          | 0.5491        | 0.5488        | 0.5487        | <b>0.5511</b> | 0.5508        |
| ITGAE    | 0.347         | 0.3461 | 0.3455        | 0.3485        | 0.349         | 0.3495        | 0.3439        | 0.3444        | <b>0.3497</b> |
| SGCB     | 0.239         | 0.2411 | 0.2433        | 0.2426        | 0.2402        | 0.2403        | 0.2412        | <b>0.246</b>  | 0.2439        |
| PLS1     | 0.335         | 0.3363 | 0.3343        | 0.3339        | 0.335         | 0.3324        | 0.3339        | 0.336         | <b>0.3369</b> |
| PCMT1    | 0.5858        | 0.5852 | 0.5861        | 0.5871        | 0.5862        | <b>0.588</b>  | 0.5852        | 0.5858        | 0.5876        |
| INPP4B   | 0.4622        | 0.4615 | 0.4618        | 0.46          | <b>0.4647</b> | 0.4614        | 0.4621        | 0.4602        | 0.4643        |
| CHEK1    | 0.3956        | 0.3983 | 0.3976        | 0.3972        | 0.3973        | 0.3988        | 0.3988        | 0.3945        | <b>0.3996</b> |
| DAG1     | 0.4767        | 0.4777 | 0.4762        | 0.4756        | 0.4763        | 0.4768        | 0.4774        | 0.4761        | <b>0.4786</b> |
| GHR      | 0.4814        | 0.4833 | 0.4806        | 0.481         | 0.4834        | 0.4821        | 0.4829        | 0.4795        | <b>0.4842</b> |
| SCYL3    | 0.275         | 0.2756 | 0.2803        | 0.2792        | 0.2786        | 0.28          | 0.2755        | 0.2776        | <b>0.2806</b> |
| POLG2    | 0.1879        | 0.1835 | 0.1868        | 0.1847        | <b>0.191</b>  | 0.1868        | 0.1877        | 0.1879        | 0.1898        |
| NOLC1    | 0.4819        | 0.4836 | 0.4845        | <b>0.4869</b> | 0.4837        | 0.4855        | 0.4838        | 0.4818        | 0.4867        |
| POLE2    | 0.6244        | 0.626  | 0.6266        | 0.6266        | 0.6259        | 0.6261        | 0.6253        | 0.6265        | <b>0.6274</b> |
| RAD51C   | 0.3238        | 0.3246 | 0.3263        | 0.3261        | 0.3233        | <b>0.3277</b> | 0.3261        | 0.3262        | 0.3273        |
| KIF14    | 0.2685        | 0.2662 | 0.2674        | 0.2669        | 0.2653        | 0.2651        | <b>0.2688</b> | 0.2657        | 0.2687        |
| SLC35A3  | <b>0.4422</b> | 0.4409 | 0.4397        | 0.4391        | 0.4408        | 0.4383        | 0.4402        | 0.4399        | 0.4419        |

|           |               |        |        |               |               |               |               |               |               |
|-----------|---------------|--------|--------|---------------|---------------|---------------|---------------|---------------|---------------|
| AKT1      | 0.5895        | 0.5901 | 0.591  | 0.589         | 0.5899        | 0.5883        | 0.5903        | 0.5898        | <b>0.5915</b> |
| MUC1      | 0.5587        | 0.5559 | 0.558  | 0.5583        | 0.5586        | 0.5584        | 0.5576        | 0.5582        | <b>0.5602</b> |
| CASP2     | 0.2185        | 0.2206 | 0.2189 | 0.2216        | 0.2199        | 0.2207        | 0.2199        | <b>0.226</b>  | 0.223         |
| PARP1     | <b>0.5533</b> | 0.5515 | 0.5505 | 0.5524        | 0.5514        | 0.5495        | 0.5517        | 0.5516        | 0.5532        |
| FDFT1     | 0.4287        | 0.4301 | 0.4282 | 0.4296        | <b>0.4325</b> | 0.427         | 0.4306        | 0.4278        | 0.4319        |
| CCND1     | 0.3906        | 0.3914 | 0.3908 | 0.3928        | 0.3928        | 0.3923        | 0.394         | 0.3919        | <b>0.3946</b> |
| OXA1L     | 0.1624        | 0.1622 | 0.1576 | 0.1586        | 0.163         | 0.1625        | 0.162         | <b>0.1648</b> | 0.1636        |
| CDC42     | 0.3164        | 0.3202 | 0.3193 | 0.3186        | 0.3186        | 0.321         | <b>0.3227</b> | 0.3204        | 0.3222        |
| ADH5      | 0.2575        | 0.2561 | 0.2576 | 0.26          | 0.256         | <b>0.2607</b> | 0.2555        | 0.2586        | 0.2605        |
| CYCS      | 0.2857        | 0.286  | 0.2861 | 0.2862        | 0.2837        | <b>0.288</b>  | 0.2847        | 0.2858        | 0.2879        |
| COPS7A    | 0.3624        | 0.3647 | 0.3635 | 0.3635        | 0.3618        | 0.3641        | 0.3647        | 0.3631        | <b>0.366</b>  |
| GLOD4     | 0.5245        | 0.5264 | 0.5279 | 0.5279        | 0.5286        | 0.5289        | 0.5281        | 0.5277        | <b>0.5292</b> |
| DLI       | 0.241         | 0.241  | 0.2402 | 0.2393        | 0.2384        | 0.2417        | 0.239         | 0.2414        | <b>0.2426</b> |
| IFRD2     | 0.2813        | 0.2864 | 0.285  | 0.2842        | 0.2851        | 0.2846        | 0.2838        | 0.2841        | <b>0.2867</b> |
| TSPAN6    | 0.3665        | 0.3705 | 0.3707 | <b>0.3731</b> | 0.3701        | 0.3707        | 0.37          | 0.3714        | 0.373         |
| CDKN1B    | <b>0.2094</b> | 0.2047 | 0.2051 | 0.2026        | 0.202         | 0.2058        | 0.2044        | 0.2055        | 0.2072        |
| PRPF4     | 0.2239        | 0.223  | 0.2223 | 0.2202        | 0.2212        | 0.222         | <b>0.225</b>  | 0.223         | 0.2248        |
| CBR1      | 0.4013        | 0.4015 | 0.4038 | 0.405         | 0.403         | 0.4033        | 0.4029        | <b>0.4059</b> | 0.4051        |
| NR2F6     | 0.4343        | 0.432  | 0.4323 | 0.4315        | 0.4323        | 0.4335        | 0.4324        | 0.4328        | <b>0.4345</b> |
| TSPAN4    | 0.5372        | 0.5391 | 0.5377 | 0.5397        | 0.5372        | 0.538         | 0.5401        | 0.5389        | <b>0.5402</b> |
| PSIP1     | 0.237         | 0.2374 | 0.2364 | 0.2333        | 0.2372        | 0.2359        | 0.2378        | 0.2368        | <b>0.2393</b> |
| AURKB     | 0.5254        | 0.5261 | 0.5261 | 0.5257        | 0.526         | 0.526         | 0.5266        | 0.5251        | <b>0.5277</b> |
| RPA3      | 0.5603        | 0.5592 | 0.5614 | 0.5607        | 0.5601        | 0.5605        | 0.5601        | 0.5607        | <b>0.562</b>  |
| HDGFRP3   | 0.3709        | 0.3711 | 0.371  | 0.3701        | 0.3723        | 0.3717        | 0.3714        | 0.3687        | <b>0.3733</b> |
| RRS1      | 0.2586        | 0.2616 | 0.2624 | 0.2587        | 0.2596        | 0.2588        | 0.2606        | 0.2596        | <b>0.2626</b> |
| EED       | 0.4031        | 0.405  | 0.4047 | 0.4038        | 0.4039        | 0.405         | 0.4049        | 0.4043        | <b>0.4063</b> |
| GATA3     | 0.6088        | 0.6087 | 0.6071 | 0.6079        | 0.6086        | 0.6086        | 0.6069        | <b>0.6101</b> | 0.6098        |
| CETN3     | 0.4343        | 0.4348 | 0.4377 | 0.4389        | 0.4373        | <b>0.4391</b> | 0.4351        | 0.4366        | 0.4389        |
| TGFB3     | 0.5191        | 0.5196 | 0.5181 | 0.519         | 0.518         | 0.519         | 0.5192        | 0.5196        | <b>0.5206</b> |
| HIST1H2BK | 0.4033        | 0.4024 | 0.4035 | 0.4026        | 0.4016        | 0.4035        | 0.4024        | 0.4002        | <b>0.4047</b> |
| ANXA7     | 0.5195        | 0.5181 | 0.5193 | 0.5198        | 0.5177        | 0.5182        | 0.5202        | 0.5181        | <b>0.5211</b> |
| PUF60     | <b>0.261</b>  | 0.2588 | 0.2574 | 0.2573        | 0.2587        | 0.2558        | 0.2583        | 0.2586        | <b>0.261</b>  |
| CFLAR     | 0.3329        | 0.3354 | 0.3395 | <b>0.3417</b> | 0.3359        | 0.3382        | 0.3335        | 0.3349        | 0.3391        |
| RPL39L    | 0.4126        | 0.415  | 0.4149 | 0.4139        | 0.4139        | 0.4152        | 0.4128        | 0.4137        | <b>0.4162</b> |
| CHEK2     | 0.4908        | 0.4903 | 0.4917 | 0.4915        | <b>0.4937</b> | 0.4904        | 0.4905        | 0.4893        | 0.493         |
| HMG20B    | 0.3731        | 0.373  | 0.3752 | 0.3761        | 0.3731        | 0.3764        | 0.3741        | 0.3738        | <b>0.3767</b> |
| TPM1      | 0.5297        | 0.5299 | 0.5308 | 0.5307        | 0.5301        | 0.5294        | 0.5294        | 0.5307        | <b>0.5316</b> |
| BDH1      | 0.7226        | 0.7229 | 0.7214 | 0.7219        | 0.7207        | 0.7208        | 0.7226        | 0.7221        | <b>0.7233</b> |
| LSM5      | 0.3134        | 0.3122 | 0.3122 | 0.3116        | 0.3138        | 0.3125        | 0.3136        | 0.312         | <b>0.3146</b> |
| TXNDC9    | 0.2033        | 0.2011 | 0.2026 | 0.2002        | 0.2005        | 0.201         | 0.2026        | 0.2007        | <b>0.2041</b> |
| HN1L      | 0.5504        | 0.5505 | 0.5472 | 0.5479        | 0.5499        | 0.5477        | 0.5491        | <b>0.5506</b> | <b>0.5506</b> |
| ZMIZ1     | 0.366         | 0.365  | 0.3686 | 0.3661        | 0.3655        | 0.3678        | 0.3675        | <b>0.3689</b> | 0.3688        |
| PDS5A     | 0.4265        | 0.4274 | 0.4296 | 0.4308        | <b>0.4324</b> | 0.4276        | 0.4297        | 0.4285        | 0.431         |
| XPO7      | 0.3139        | 0.3155 | 0.3139 | 0.3134        | 0.3165        | 0.3162        | 0.3142        | 0.3167        | <b>0.3175</b> |
| COG4      | 0.4244        | 0.4251 | 0.4221 | 0.4229        | 0.4258        | 0.4225        | 0.4235        | 0.424         | <b>0.4261</b> |
| TMEM97    | 0.4558        | 0.455  | 0.456  | 0.4537        | <b>0.4609</b> | 0.4533        | 0.4566        | 0.4584        | 0.4578        |
| TFDP1     | 0.5556        | 0.5546 | 0.5547 | 0.5561        | 0.5567        | 0.5547        | 0.5562        | <b>0.5581</b> | 0.5576        |

|          |               |              |               |               |               |               |               |               |               |
|----------|---------------|--------------|---------------|---------------|---------------|---------------|---------------|---------------|---------------|
| KAT6B    | 0.3658        | 0.3681       | 0.3699        | 0.3669        | <b>0.3701</b> | 0.3676        | 0.3672        | 0.3635        | 0.3699        |
| ADO      | 0.2842        | 0.2865       | 0.2875        | 0.2843        | 0.2823        | 0.2853        | 0.2851        | 0.2861        | <b>0.2876</b> |
| JADE2    | 0.4849        | 0.4846       | 0.4833        | 0.4849        | 0.4843        | 0.4843        | 0.4855        | 0.4835        | <b>0.4866</b> |
| PCCB     | 0.2735        | 0.2781       | 0.2745        | 0.2748        | 0.2738        | 0.2737        | 0.2773        | <b>0.2783</b> | 0.2776        |
| KIAA1033 | 0.1856        | 0.1873       | 0.1903        | 0.1892        | 0.1857        | 0.1909        | 0.187         | <b>0.1927</b> | 0.1907        |
| RRP1B    | 0.4777        | 0.4796       | 0.4814        | 0.4794        | 0.4806        | 0.4789        | 0.4785        | 0.4795        | <b>0.4818</b> |
| THAP11   | 0.3153        | 0.3166       | 0.3177        | 0.3182        | 0.3197        | 0.3178        | 0.316         | 0.3186        | <b>0.3198</b> |
| C2CD5    | 0.4357        | 0.4349       | 0.4368        | 0.4365        | 0.437         | 0.4355        | 0.4365        | 0.4374        | <b>0.4382</b> |
| POLR2I   | 0.2334        | 0.2326       | 0.232         | 0.2334        | 0.2313        | 0.2338        | 0.2309        | 0.233         | <b>0.2346</b> |
| RPIA     | 0.5189        | 0.5185       | 0.5213        | <b>0.5224</b> | 0.5194        | 0.5219        | 0.5184        | 0.5189        | 0.5219        |
| PLCB3    | 0.4166        | 0.419        | 0.4201        | 0.4171        | 0.4185        | 0.4189        | 0.419         | 0.4185        | <b>0.4204</b> |
| ASAH1    | 0.4465        | 0.4457       | 0.4453        | 0.4464        | <b>0.4487</b> | 0.4461        | 0.447         | 0.4455        | 0.4485        |
| SMARCA4  | 0.5055        | 0.505        | 0.503         | 0.5021        | 0.5034        | 0.5032        | <b>0.5071</b> | 0.5017        | 0.506         |
| ATP5S    | <b>0.4624</b> | 0.4602       | 0.4576        | 0.4576        | 0.4579        | 0.458         | 0.4588        | 0.4572        | 0.4609        |
| PARP2    | 0.3808        | 0.3812       | 0.3824        | 0.3822        | 0.3837        | 0.3805        | 0.3819        | 0.3816        | <b>0.3838</b> |
| AKR7A2   | 0.4009        | 0.3979       | 0.3997        | 0.3982        | 0.3989        | 0.3994        | 0.3985        | 0.4003        | <b>0.4013</b> |
| SPDEF    | 0.7371        | 0.7376       | 0.7384        | 0.7386        | <b>0.7392</b> | 0.738         | 0.7381        | 0.7369        | 0.739         |
| CCNB1    | 0.3837        | <b>0.386</b> | 0.384         | 0.3805        | 0.3843        | 0.3828        | 0.383         | 0.3825        | 0.3855        |
| ERBB2    | 0.3681        | 0.3698       | 0.3679        | 0.3678        | 0.366         | 0.3679        | 0.3669        | 0.3687        | <b>0.3705</b> |
| VDAC1    | 0.14          | 0.1411       | 0.1391        | 0.14          | 0.1419        | <b>0.1452</b> | 0.1408        | 0.1395        | 0.1437        |
| GAPDH    | 0.2432        | 0.2428       | 0.2388        | 0.2422        | 0.2413        | 0.2428        | 0.2429        | 0.2396        | <b>0.244</b>  |
| CNDP2    | 0.3714        | 0.3729       | 0.3733        | 0.3742        | 0.3735        | 0.3734        | 0.3733        | 0.3717        | <b>0.3755</b> |
| ADI1     | 0.3571        | 0.3573       | 0.3555        | 0.3543        | 0.3557        | 0.3538        | 0.3554        | 0.3547        | <b>0.3582</b> |
| TMEM50A  | 0.532         | 0.5311       | 0.5318        | 0.5294        | 0.5331        | 0.5297        | 0.5319        | 0.5293        | <b>0.5332</b> |
| HACD3    | 0.2863        | 0.2859       | 0.2865        | 0.2875        | 0.2876        | 0.2887        | 0.2877        | 0.2863        | <b>0.2897</b> |
| YKT6     | 0.733         | 0.7339       | 0.7338        | 0.7321        | 0.734         | 0.7347        | 0.7333        | 0.7337        | <b>0.7351</b> |
| BZW2     | 0.3537        | 0.3557       | 0.3565        | 0.356         | 0.3545        | 0.3575        | 0.3532        | 0.3566        | <b>0.3577</b> |
| EVL      | 0.4192        | 0.4176       | 0.4194        | 0.4186        | 0.418         | 0.4179        | 0.4194        | 0.4196        | <b>0.4206</b> |
| MIF      | 0.4915        | 0.4931       | 0.4957        | 0.4951        | 0.4928        | <b>0.4965</b> | 0.492         | 0.495         | 0.4956        |
| IARS2    | 0.4712        | 0.4698       | 0.4701        | 0.4704        | <b>0.4728</b> | 0.4701        | 0.4704        | 0.4691        | 0.4721        |
| KLHDC2   | 0.5697        | 0.5711       | 0.5693        | 0.5686        | 0.5677        | 0.5677        | <b>0.5717</b> | 0.5694        | 0.5713        |
| STUB1    | 0.3342        | 0.3356       | 0.3338        | 0.3358        | 0.3376        | 0.3374        | 0.3347        | 0.3351        | <b>0.3377</b> |
| ENOPH1   | 0.2858        | 0.2885       | <b>0.2917</b> | 0.2897        | 0.2867        | 0.2885        | 0.2875        | 0.2911        | 0.2906        |
| MRPS2    | 0.2632        | 0.2639       | 0.2603        | 0.2603        | 0.258         | 0.2616        | 0.2634        | 0.2629        | <b>0.2642</b> |
| NUP85    | 0.424         | 0.4248       | 0.4216        | 0.4252        | 0.4233        | <b>0.4274</b> | 0.4219        | 0.4246        | 0.4258        |
| FIS1     | 0.2984        | 0.2943       | 0.2992        | 0.2989        | 0.2984        | 0.2992        | <b>0.3009</b> | 0.299         | 0.3008        |
| NUSAP1   | 0.4675        | 0.4699       | 0.4706        | <b>0.4733</b> | 0.4698        | 0.471         | 0.4693        | 0.469         | 0.4723        |
| MRPS16   | 0.3476        | 0.347        | 0.3484        | 0.3494        | 0.3435        | <b>0.3501</b> | 0.3469        | 0.3443        | 0.3495        |
| NPDC1    | 0.2553        | 0.258        | 0.2593        | 0.2561        | 0.2577        | 0.256         | 0.2571        | <b>0.2608</b> | 0.2603        |
| DERA     | 0.3533        | 0.3531       | 0.3556        | 0.3563        | 0.3533        | 0.3516        | <b>0.357</b>  | 0.356         | <b>0.357</b>  |
| UBR7     | 0.4379        | 0.4389       | 0.438         | 0.4394        | 0.4374        | 0.4371        | 0.4375        | 0.4363        | <b>0.44</b>   |
| ISOC1    | 0.3885        | 0.3892       | 0.3882        | 0.39          | 0.3887        | 0.3867        | 0.3895        | 0.3898        | <b>0.3908</b> |
| CCDC92   | 0.3958        | 0.3974       | 0.3968        | 0.3966        | 0.3972        | 0.3971        | 0.3966        | 0.396         | <b>0.3988</b> |
| SCAND1   | 0.4478        | 0.4465       | 0.4466        | 0.4467        | 0.4461        | 0.4467        | 0.448         | 0.4467        | <b>0.4489</b> |
| ZDHHC6   | 0.3468        | 0.3465       | 0.3439        | 0.3469        | 0.3475        | 0.347         | 0.3467        | 0.3441        | <b>0.3484</b> |
| TIMM9    | <b>0.3882</b> | 0.3871       | 0.3832        | 0.3826        | 0.3856        | 0.3834        | 0.3869        | 0.382         | 0.3875        |
| GMNN     | 0.547         | 0.5464       | <b>0.5503</b> | 0.5491        | 0.549         | 0.5488        | 0.5476        | 0.5474        | 0.5498        |



|         |               |               |               |               |               |               |              |               |               |
|---------|---------------|---------------|---------------|---------------|---------------|---------------|--------------|---------------|---------------|
| CDCA4   | 0.5363        | 0.5355        | 0.5365        | 0.5371        | 0.5375        | 0.5353        | 0.5358       | 0.534         | <b>0.538</b>  |
| NENF    | 0.4988        | 0.4968        | 0.4976        | 0.4989        | 0.4942        | 0.4986        | 0.4975       | 0.4956        | <b>0.4995</b> |
| DNAJC15 | 0.3155        | 0.3166        | 0.317         | 0.3154        | <b>0.322</b>  | 0.3152        | 0.3158       | 0.3155        | 0.3196        |
| HEBP1   | 0.4344        | 0.4352        | 0.4367        | 0.4352        | 0.4371        | 0.4357        | 0.4368       | 0.4367        | <b>0.4376</b> |
| CD320   | 0.3378        | 0.3387        | 0.3382        | 0.3371        | 0.3388        | 0.3377        | 0.3384       | 0.3396        | <b>0.3402</b> |
| CHMP4A  | 0.3617        | 0.3616        | 0.3607        | 0.3628        | 0.3639        | 0.3616        | <b>0.365</b> | 0.3642        | 0.3649        |
| HEATR1  | 0.2344        | 0.2352        | 0.2364        | 0.2343        | 0.2365        | 0.2355        | 0.2367       | 0.2337        | <b>0.2383</b> |
| CISD1   | 0.5626        | 0.561         | 0.5621        | 0.563         | 0.5633        | 0.5613        | 0.5611       | 0.5625        | <b>0.5637</b> |
| SUV39H1 | 0.4118        | 0.4106        | 0.4075        | 0.4102        | 0.4122        | 0.4097        | 0.4105       | 0.4097        | <b>0.4127</b> |
| VPS28   | 0.337         | 0.3366        | 0.3326        | 0.3348        | <b>0.3386</b> | 0.3352        | 0.3362       | 0.3385        | 0.3379        |
| KIF20A  | 0.5461        | 0.5452        | 0.5433        | 0.544         | 0.5458        | 0.5455        | 0.5441       | 0.5448        | <b>0.5467</b> |
| METRNL  | 0.2418        | <b>0.2464</b> | 0.2441        | 0.2433        | 0.2415        | 0.2451        | 0.2421       | 0.2389        | 0.2461        |
| LAGE3   | 0.5423        | 0.5429        | 0.5419        | 0.5408        | 0.5416        | 0.5424        | 0.5431       | 0.5409        | <b>0.5439</b> |
| PXMP2   | 0.5113        | 0.5101        | 0.5115        | 0.5107        | 0.5098        | <b>0.5127</b> | 0.5116       | 0.5107        | 0.5126        |
| AMDHD2  | 0.4398        | 0.4391        | 0.4399        | 0.4387        | 0.439         | 0.4383        | 0.4398       | <b>0.4418</b> | 0.4414        |
| FBXO11  | 0.1828        | 0.1869        | 0.1878        | 0.1869        | 0.1877        | 0.1866        | 0.1882       | <b>0.1937</b> | 0.1895        |
| MTERF3  | 0.4058        | 0.4035        | 0.4056        | 0.4037        | 0.4048        | 0.4042        | 0.4032       | 0.4029        | <b>0.406</b>  |
| PSMD10  | 0.3725        | 0.3724        | 0.3742        | 0.3708        | 0.3703        | 0.3707        | 0.3733       | 0.3739        | <b>0.3745</b> |
| TSEN2   | 0.4133        | 0.4154        | <b>0.4179</b> | 0.4155        | 0.4165        | 0.4146        | 0.4152       | 0.4151        | 0.4173        |
| PRR7    | 0.4656        | 0.4683        | 0.4693        | <b>0.4715</b> | 0.4686        | 0.4688        | 0.4658       | 0.4695        | 0.4703        |
| GTPBP8  | 0.2136        | 0.2129        | 0.2159        | 0.2158        | 0.2135        | <b>0.2171</b> | 0.2134       | 0.2161        | <b>0.2171</b> |
| DENND2D | <b>0.3045</b> | 0.3033        | 0.3013        | 0.3023        | 0.3004        | 0.3019        | 0.3025       | 0.3008        | <b>0.3045</b> |
| ARPP19  | 0.2112        | 0.2096        | 0.2116        | 0.2105        | 0.2101        | 0.2066        | 0.2083       | 0.2126        | <b>0.2128</b> |
| ATG3    | 0.2906        | 0.2902        | 0.2919        | 0.2908        | 0.2909        | 0.2893        | 0.289        | 0.2883        | <b>0.293</b>  |
| WDR61   | 0.4329        | 0.432         | 0.4339        | 0.4348        | 0.4332        | 0.4323        | 0.4319       | <b>0.4373</b> | 0.4353        |
| CANT1   | 0.2319        | <b>0.2347</b> | 0.231         | 0.2312        | 0.232         | 0.2324        | 0.2312       | 0.2325        | 0.2346        |
| FAM63A  | 0.4159        | 0.4157        | 0.4125        | 0.4156        | 0.4148        | 0.4178        | 0.417        | <b>0.4208</b> | 0.4183        |
| ATF1    | 0.4881        | 0.4888        | 0.4901        | 0.4905        | 0.4884        | 0.4902        | 0.4886       | 0.4901        | <b>0.4911</b> |
| TSTA3   | 0.4897        | 0.4897        | 0.4908        | 0.491         | 0.4905        | <b>0.4925</b> | 0.4891       | 0.4917        | 0.4924        |

supplementary table 3. The top 5 genes participating in improving the predictions for each gene, the last column demonstrates the importance of the first gene.

| index           | gene 1   | gene 2   | gene 3    | gene 4   | gene 5   | gene importance |
|-----------------|----------|----------|-----------|----------|----------|-----------------|
| <b>DDR1</b>     | SCRN1    | NNT      | ERBB3     | NIPSNAP1 | BCL2     | 0.211           |
| <b>RHOA</b>     | SKP1     | ELAVL1   | SCP2      | PAICS    | NIPSNAP1 | 0.29            |
| <b>RNPS1</b>    | RRP1B    | GLOD4    | TMEM109   | NUP62    | SYPL1    | 0.194           |
| <b>RPS6</b>     | S100A13  | SLC35A1  | CPNE3     | PSME1    | NRAS     | 0.133           |
| <b>CSRP1</b>    | GALE     | HSD17B10 | GAPDH     | STUB1    | CHMP4A   | 0.072           |
| <b>XBP1</b>     | SPDEF    | NET1     | NRAS      | HN1L     | PRSS23   | 0.297           |
| <b>SKP1</b>     | NRAS     | RHOA     | LAGE3     | ANXA7    | TMEM50A  | 0.247           |
| <b>CAPN1</b>    | MUC1     | THAP11   | HIST1H2BK | S100A4   | HES1     | 0.544           |
| <b>CTSD</b>     | AKT1     | PRSS23   | NPDC1     | EML3     | PRR7     | 0.279           |
| <b>MAT2A</b>    | CDC25A   | AURKB    | MSH6      | TSEN2    | NR2F6    | 0.234           |
| <b>STMN1</b>    | BIRC5    | TIMELESS | EZH2      | TOP2A    | ANXA7    | 0.259           |
| <b>CIRBP</b>    | GAA      | ARHGAP1  | DDB2      | TCEAL4   | PRAF2    | 0.249           |
| <b>PSME1</b>    | DECR1    | NIPSNAP1 | PSME2     | SKP1     | NRAS     | 0.335           |
| <b>PGAM1</b>    | PAICS    | HSD17B10 | MYCBP     | TFDP1    | MIF      | 0.158           |
| <b>STAT1</b>    | UBE2A    | NNT      | ARHGAP1   | SYNE2    | RPA1     | 0.151           |
| <b>GNAS</b>     | GAA      | SMARCA4  | RPA1      | NIPSNAP1 | ENOSF1   | 0.082           |
| <b>HIF1A</b>    | CCNH     | TCEAL4   | RB1       | TIMM17B  | CTSD     | 0.196           |
| <b>PAICS</b>    | HDAC2    | PSMG1    | ICAM3     | LAGE3    | BDH1     | 0.336           |
| <b>HADH</b>     | SCP2     | CISD1    | CHEK2     | OXCT1    | S100A13  | 0.124           |
| <b>SMARCC1</b>  | MBNL1    | SYNE2    | HN1L      | NOLC1    | CNDP2    | 0.18            |
| <b>PIP4K2B</b>  | DAG1     | NNT      | B4GAT1    | NIPSNAP1 | GAA      | 0.201           |
| <b>PFKL</b>     | GAA      | LIG1     | ELAVL1    | PARP1    | MIF      | 0.124           |
| <b>PGRMC1</b>   | RPA1     | SDHB     | HN1L      | UBE2A    | ANXA7    | 0.308           |
| <b>MBNL1</b>    | SMC4     | SMARCC1  | LBR       | GLOD4    | HN1L     | 0.223           |
| <b>PCNA</b>     | CCNA2    | PPIC     | UBE2C     | HPRT1    | UGDH     | 0.288           |
| <b>ILK</b>      | TSTA3    | NUDCD3   | PSME2     | S100A4   | TPM1     | 0.101           |
| <b>SYPL1</b>    | PIP4K2B  | NNT      | PDS5A     | RPS6     | HDAC2    | 0.22            |
| <b>NUDCD3</b>   | ENOSF1   | TSTA3    | PIP4K2B   | RAB4A    | SKP1     | 0.165           |
| <b>TOP2A</b>    | UBE2C    | CDK1     | YKT6      | KIF20A   | SMC4     | 0.352           |
| <b>EBNA1BP2</b> | SDHB     | NOLC1    | NUP93     | RPIA     | TPM1     | 0.293           |
| <b>SCP2</b>     | NNT      | RHOA     | CRYZ      | NRAS     | DECR1    | 0.24            |
| <b>TMEM109</b>  | TIMELESS | PAFAH1B3 | MCM3      | CDK4     | RFC2     | 0.362           |
| <b>TRAP1</b>    | MRPL12   | TSTA3    | SMARCA4   | RUVBL1   | PAICS    | 0.114           |
| <b>SOX4</b>     | TLE1     | NFKBIA   | GATA3     | NET1     | BAMBI    | 0.147           |
| <b>SCRN1</b>    | DDR1     | PSRC1    | TPM1      | RB1      | CHEK1    | 0.245           |
| <b>NFKBIA</b>   | SOX4     | DAG1     | GAA       | GATA3    | HSD17B10 | 0.288           |
| <b>G3BP1</b>    | TMEM97   | POLR2K   | CPNE3     | CDCA4    | USP1     | 0.116           |
| <b>RPA1</b>     | PGRMC1   | TIMELESS | SMARCA4   | ATMIN    | SYNE2    | 0.204           |
| <b>MCM3</b>     | TIMELESS | TMEM109  | SMC4      | CDK2     | NUP85    | 0.578           |
| <b>SMC1A</b>    | XPO7     | TIMELESS | OXCT1     | MAT2A    | GAPDH    | 0.067           |
| <b>PWP1</b>     | MRPL19   | EZH2     | TBP       | NOLC1    | EBNA1BP2 | 0.112           |
| <b>ICMT</b>     | TIMELESS | TMEM109  | RPA1      | PARP1    | AKT1     | 0.171           |

|                 |          |          |          |          |          |       |
|-----------------|----------|----------|----------|----------|----------|-------|
| <b>RUVBL1</b>   | MYBL2    | TFDP1    | PAFAH1B3 | SDHB     | TSEN2    | 0.32  |
| <b>RRAGA</b>    | PRAF2    | SCRN1    | CCDC92   | GALE     | TPM1     | 0.094 |
| <b>SMC4</b>     | AURKA    | CCNA2    | YKT6     | TOP2A    | NUP62    | 0.413 |
| <b>NIPSNAP1</b> | PSME1    | BDH1     | PIP4K2B  | CDK4     | RPA1     | 0.249 |
| <b>MYBL2</b>    | TMEM109  | RUVBL1   | TFDP1    | BIRC5    | TIMELESS | 0.137 |
| <b>ELAVL1</b>   | PAICS    | RHOA     | HACD3    | SCRN1    | RB1      | 0.355 |
| <b>KIAA0100</b> | DAG1     | HSD17B10 | ENOSF1   | HN1L     | GAA      | 0.084 |
| <b>TP53</b>     | ERBB3    | CDK4     | DDB2     | NR2F6    | JADE2    | 0.309 |
| <b>PSME2</b>    | PSME1    | HSD17B10 | SDHB     | MYCBP    | ILK      | 0.18  |
| <b>LBR</b>      | SMC4     | AURKA    | EZH2     | HDAC2    | PCMT1    | 0.106 |
| <b>SCCPDH</b>   | INPP4B   | GAA      | SDHB     | ANXA7    | DECR1    | 0.265 |
| <b>SMARCD2</b>  | TSTA3    | COPS7A   | COG4     | SMARCA4  | AKT1     | 0.184 |
| <b>NET1</b>     | XBP1     | TP53     | GATA3    | BAMBI    | GAA      | 0.357 |
| <b>HDAC2</b>    | PAICS    | NRAS     | POP4     | GALE     | PSMD10   | 0.277 |
| <b>HSPB1</b>    | S100A13  | SMARCD2  | MIF      | RPS6     | ILK      | 0.067 |
| <b>CDC25B</b>   | OXCT1    | YKT6     | TSPAN4   | SLC35A1  | MSH6     | 0.222 |
| <b>ATMIN</b>    | DAG1     | NUP62    | PCM1     | RRP1B    | PCMT1    | 0.051 |
| <b>PSRC1</b>    | BIRC5    | AURKA    | AURKB    | SCRN1    | YKT6     | 0.299 |
| <b>UBE2A</b>    | CPNE3    | ANXA7    | EBNA1BP2 | PGRMC1   | EAPP     | 0.26  |
| <b>COASY</b>    | MYCBP    | TSTA3    | SKP1     | GAPDH    | ICAM3    | 0.079 |
| <b>BIRC5</b>    | CCNA2    | POP4     | YKT6     | NUSAP1   | AURKA    | 0.51  |
| <b>ARHGAP1</b>  | AKT1     | PLCB3    | LIG1     | TIMELESS | TMEM109  | 0.183 |
| <b>CPNE3</b>    | UBE2A    | SKP1     | PCMT1    | ATF1     | RPS6     | 0.252 |
| <b>NUP62</b>    | SMC4     | JADE2    | PAICS    | HN1L     | LIG1     | 0.345 |
| <b>PCM1</b>     | PDS5A    | HN1L     | NUP62    | XPO7     | ENOSF1   | 0.108 |
| <b>NUP93</b>    | EBNA1BP2 | FAH      | CCNH     | GATA3    | NOLC1    | 0.32  |
| <b>PLK1</b>     | BRCA1    | AURKA    | BIRC5    | CDC20    | KIF14    | 0.163 |
| <b>CDK4</b>     | ERBB3    | BDH1     | TMEM109  | TP53     | PSME1    | 0.274 |
| <b>HSD17B10</b> | SDHB     | SMARCA4  | DAG1     | NIPSNAP1 | GALE     | 0.351 |
| <b>CSK</b>      | AKT1     | CEBPA    | COG4     | MRPL12   | PRKCD    | 0.168 |
| <b>TCEAL4</b>   | DECR1    | NR2F6    | ERBB3    | CDK4     | PSME1    | 0.184 |
| <b>USP1</b>     | CDCA4    | SMC4     | YKT6     | ATF1     | NUP62    | 0.313 |
| <b>MPC2</b>     | GTF2A2   | MYCBP    | ELOVL6   | RPA3     | ITGAE    | 0.313 |
| <b>DECR1</b>    | PSME1    | TCEAL4   | DDB2     | TMEM50A  | DYNLT3   | 0.279 |
| <b>ERBB3</b>    | NNT      | PIP4K2B  | GATA3    | SOX4     | KLHDC2   | 0.152 |
| <b>PRSS23</b>   | SPDEF    | CTSD     | XBP1     | NRIP1    | EZH2     | 0.33  |
| <b>IKBKAP</b>   | TIMELESS | RPA1     | EZH2     | AKT1     | TSEN2    | 0.18  |
| <b>GALE</b>     | DDB2     | CDC25B   | ABCB6    | TSPAN4   | MRPL12   | 0.138 |
| <b>PRKCD</b>    | PIP4K2B  | CSK      | GAA      | BAMBI    | SYPL1    | 0.236 |
| <b>S100A13</b>  | ICMT     | PSME1    | TSPAN4   | SLC35A1  | DECR1    | 0.187 |
| <b>NRIP1</b>    | XBP1     | C2CD5    | SOX4     | GATA3    | PRSS23   | 0.266 |
| <b>EAPP</b>     | SLC35A1  | ATF1     | UBE2A    | TSPAN6   | PSME1    | 0.157 |
| <b>POLR2K</b>   | NRAS     | SKP1     | MYCBP    | CRYZ     | CCNH     | 0.318 |
| <b>NRAS</b>     | HDAC2    | POLR2K   | SKP1     | CRYZ     | LYPLA1   | 0.309 |
| <b>SDHB</b>     | ANXA7    | HSD17B10 | PGRMC1   | PAICS    | EBNA1BP2 | 0.316 |
| <b>GTF2A2</b>   | POP4     | MPC2     | CRYZ     | SLC35A1  | DNAJC15  | 0.357 |
| <b>CCNB2</b>    | CCNA2    | BIRC5    | TOP2A    | AURKA    | KIF20A   | 0.441 |

|                 |          |          |          |          |          |       |
|-----------------|----------|----------|----------|----------|----------|-------|
| <b>LIG1</b>     | ARHGAP1  | TIMELESS | S100A13  | GAA      | RPA1     | 0.273 |
| <b>EBP</b>      | PAICS    | FDFT1    | LAGE3    | TMEM97   | ICAM3    | 0.262 |
| <b>WRB</b>      | PAICS    | CISD1    | PCMT1    | MYCBP    | NIPSNAP1 | 0.185 |
| <b>SYNE2</b>    | RPA1     | SMARCC1  | TIMELESS | MSH6     | PDS5A    | 0.077 |
| <b>OXCT1</b>    | PARP1    | TIMELESS | NENF     | GHR      | ELOVL6   | 0.278 |
| <b>NNT</b>      | SCP2     | RPA1     | TOP2A    | SYPL1    | PIP4K2B  | 0.277 |
| <b>GAA</b>      | PRAF2    | KIAA0100 | NPDC1    | LIG1     | PIP4K2B  | 0.307 |
| <b>SLC37A4</b>  | NUDCD3   | CDK4     | ARHGAP1  | PRR7     | WRB      | 0.147 |
| <b>HPRT1</b>    | DCK      | NRAS     | MYCBP    | WRB      | PAICS    | 0.123 |
| <b>FAH</b>      | PAICS    | NUP93    | LAGE3    | HSD17B10 | GAA      | 0.285 |
| <b>POP4</b>     | GTF2A2   | HDAC2    | NUP88    | ANXA7    | BIRC5    | 0.354 |
| <b>CDC20</b>    | AURKA    | BIRC5    | PLK1     | YKT6     | EBNA1BP2 | 0.357 |
| <b>NUP88</b>    | YKT6     | EZH2     | MRPL12   | POP4     | PARP2    | 0.166 |
| <b>MSH6</b>     | CDC25A   | SMC4     | TIMELESS | NUP62    | PDS5A    | 0.176 |
| <b>PIN1</b>     | HSD17B10 | GALE     | PAFAH1B3 | GHR      | HMG20B   | 0.186 |
| <b>ETFB</b>     | PAFAH1B3 | TSTA3    | COG4     | PIP4K2B  | BDH1     | 0.288 |
| <b>CRYZ</b>     | NRAS     | SLC35A1  | ANXA7    | POLR2K   | DNAJC15  | 0.305 |
| <b>UBE2C</b>    | TOP2A    | YKT6     | CDK1     | AURKA    | CCNA2    | 0.467 |
| <b>LYPLA1</b>   | NRAS     | SKP1     | POLR2K   | RPA3     | ICAM3    | 0.154 |
| <b>TIMELESS</b> | MCM3     | RPA1     | LIG1     | BIRC5    | TMEM109  | 0.423 |
| <b>PAN2</b>     | TP53     | ERBB3    | CDKN1B   | PRPF4    | POLG2    | 0.075 |
| <b>RB1</b>      | TGFB3    | SCRN1    | CISD1    | CCNH     | HADH     | 0.154 |
| <b>TBP</b>      | HDAC2    | AURKA    | ANXA7    | ATF1     | EAPP     | 0.098 |
| <b>HAT1</b>     | RPA3     | POLR2K   | DNAJC15  | CYCS     | TFDP1    | 0.11  |
| <b>S100A4</b>   | SLC35A3  | ILK      | MPC2     | CCDC92   | KLHDC2   | 0.102 |
| <b>B4GAT1</b>   | BDH1     | ICAM3    | ICMT     | PRSS23   | SPDEF    | 0.346 |
| <b>ABCB6</b>    | GALE     | HSD17B10 | ANXA7    | PARP1    | GAA      | 0.29  |
| <b>RFC5</b>     | BRCA1    | BIRC5    | POLE2    | CDK1     | PSMG1    | 0.154 |
| <b>CDK1</b>     | TOP2A    | UBE2C    | BIRC5    | NRAS     | CCNA2    | 0.508 |
| <b>TLE1</b>     | SOX4     | ATMIN    | ERBB2    | GAA      | GATA3    | 0.178 |
| <b>PAFAH1B3</b> | ETFB     | TMEM109  | BDH1     | BIRC5    | LAGE3    | 0.292 |
| <b>DCK</b>      | HPRT1    | STMN1    | POLE2    | CDK1     | PSMG1    | 0.135 |
| <b>DYNLT3</b>   | DECR1    | PSME1    | POLR2K   | CPNE3    | B4GAT1   | 0.107 |
| <b>BAMBI</b>    | NET1     | SOX4     | KLHDC2   | PRKCD    | SLC35A1  | 0.304 |
| <b>SLC35A1</b>  | KLHDC2   | S100A13  | ELOVL6   | ATF1     | EAPP     | 0.17  |
| <b>ITGB1BP1</b> | SDHB     | ANXA7    | TSTA3    | SMARCD2  | PCNA     | 0.073 |
| <b>TIMM17B</b>  | PSME2    | RPL39L   | ATG3     | PRR7     | HIF1A    | 0.169 |
| <b>UGDH</b>     | PCNA     | SCCPDH   | NET1     | INPP4B   | CCND1    | 0.042 |
| <b>EZH2</b>     | STMN1    | CDC25A   | NUP88    | ZDHHC6   | SMC4     | 0.203 |
| <b>MYCBP</b>    | SDHB     | POLR2K   | LAGE3    | SKP1     | MRPL12   | 0.181 |
| <b>HES1</b>     | KLHDC2   | CCDC92   | ZMIZ1    | STMN1    | ASAHI    | 0.141 |
| <b>PSMG1</b>    | PAICS    | ANXA7    | HDAC2    | USP1     | CDCA4    | 0.356 |
| <b>DDB2</b>     | GAA      | DECR1    | S100A13  | CIRBP    | DENND2D  | 0.284 |
| <b>CCNA2</b>    | BIRC5    | SMC4     | PAICS    | AURKA    | TOP2A    | 0.499 |
| <b>EML3</b>     | TMEM109  | AKT1     | CSK      | FIS1     | CTSD     | 0.197 |
| <b>PRAF2</b>    | GAA      | NIPSNAP1 | SKP1     | ASAHI    | PSME1    | 0.346 |
| <b>MRPL19</b>   | MRPL12   | EBNA1BP2 | SDHB     | TMEM109  | TIMELESS | 0.123 |

|                 |          |          |          |          |          |       |
|-----------------|----------|----------|----------|----------|----------|-------|
| <b>MNAT1</b>    | POLR2K   | RPA3     | PCMT1    | ATF1     | NRAS     | 0.093 |
| <b>RAB4A</b>    | MYCBP    | TMEM5    | PSME1    | NUDCD3   | GAPDH    | 0.064 |
| <b>BCL2</b>     | SCRN1    | DDR1     | EVL      | OXCT1    | ICMT     | 0.141 |
| <b>RFC2</b>     | PAFAH1B3 | TMEM109  | MYBL2    | NUP93    | BIRC5    | 0.224 |
| <b>SLC25A13</b> | SMARCA4  | SMC4     | OXCT1    | MBNL1    | PARP1    | 0.099 |
| <b>MRPL12</b>   | PAICS    | GALE     | SMC4     | MYCBP    | CCND1    | 0.342 |
| <b>CEBPA</b>    | MRPL12   | CSK      | GALE     | DAG1     | NUP62    | 0.102 |
| <b>SLC5A6</b>   | SMARCA4  | GAPDH    | CSK      | MELK     | SMARCD2  | 0.169 |
| <b>AURKA</b>    | SMC4     | CCNA2    | YKT6     | CDC20    | TOP2A    | 0.383 |
| <b>CCNH</b>     | CISD1    | POLR2K   | RB1      | NUP93    | ATG3     | 0.152 |
| <b>CDC45</b>    | CDK2     | DERA     | CDC25A   | RUVBL1   | POLE2    | 0.136 |
| <b>ENOSF1</b>   | SMARCA4  | SDHB     | PIP4K2B  | GAA      | PAICS    | 0.277 |
| <b>CDK2</b>     | MYBL2    | CDK1     | NUSAP1   | ICMT     | MCM3     | 0.142 |
| <b>ELOVL6</b>   | SPDEF    | FDF1     | CCNB2    | MRPL19   | HADH     | 0.428 |
| <b>CREB1</b>    | HDAC2    | MTERF3   | ITGAE    | HES1     | SCRN1    | 0.048 |
| <b>PPIC</b>     | MYCBP    | PRAF2    | PSMD10   | RHOA     | LIG1     | 0.159 |
| <b>BRCA1</b>    | SUV39H1  | TIMELESS | MCM3     | CDC25A   | MYBL2    | 0.103 |
| <b>CCDC85B</b>  | TSTA3    | TRAP1    | CCND1    | PRR7     | ENOSF1   | 0.176 |
| <b>CCP110</b>   | MBNL1    | SYNE2    | TIMELESS | TMEM109  | USP1     | 0.122 |
| <b>CDC25A</b>   | TIMELESS | BRCA1    | TMEM109  | SUV39H1  | EED      | 0.256 |
| <b>NCK1</b>     | TBP      | NRAS     | ATF1     | PSMD10   | CDKN1B   | 0.121 |
| <b>TMEM5</b>    | PRR7     | EBNA1BP2 | RPS6     | TSTA3    | ENOSF1   | 0.079 |
| <b>MELK</b>     | USP1     | SLC5A6   | BIRC5    | SMC4     | CCNA2    | 0.088 |
| <b>CCNF</b>     | YKT6     | CDCA4    | B4GAT1   | MSH6     | PCMT1    | 0.456 |
| <b>TCFL5</b>    | GAA      | PIP4K2B  | TSPAN4   | SKP1     | CISD1    | 0.119 |
| <b>ICAM3</b>    | BDH1     | PAICS    | LAGE3    | B4GAT1   | MRPS16   | 0.186 |
| <b>ATF5</b>     | AURKA    | PSMG1    | MYBL2    | MAT2A    | TIMELESS | 0.075 |
| <b>CCNE2</b>    | CDK2     | CDC25A   | CCNH     | BRCA1    | CDC45    | 0.121 |
| <b>LSM6</b>     | GMNN     | S100A13  | ATF1     | RPA3     | POLE2    | 0.198 |
| <b>ITGAE</b>    | GTF2A2   | GMNN     | CRYZ     | ADI1     | S100A4   | 0.176 |
| <b>SGCB</b>     | SKP1     | POP4     | RHOA     | BIRC5    | PFKL     | 0.101 |
| <b>PLS1</b>     | NNT      | VPS28    | CCDC92   | TPM1     | SLC35A3  | 0.143 |
| <b>PCMT1</b>    | GHR      | POLR2K   | LBR      | CRYZ     | SPDEF    | 0.093 |
| <b>INPP4B</b>   | SCCPDH   | ERBB2    | LBR      | DENND2D  | NET1     | 0.289 |
| <b>CHEK1</b>    | AURKB    | OXCT1    | BRCA1    | HADH     | SCRN1    | 0.137 |
| <b>DAG1</b>     | PIP4K2B  | HN1L     | KIAA0100 | HSD17B10 | SKP1     | 0.208 |
| <b>GHR</b>      | OXCT1    | PCMT1    | MPC2     | DAG1     | CEBPA    | 0.206 |
| <b>SCYL3</b>    | HIF1A    | XPO7     | PRR7     | ANXA7    | HEATR1   | 0.088 |
| <b>POLG2</b>    | CETN3    | SLC35A1  | CCDC92   | CSK      | PAN2     | 0.136 |
| <b>NOLC1</b>    | EBNA1BP2 | TMEM109  | TFDP1    | NUP93    | RRP1B    | 0.312 |
| <b>POLE2</b>    | CCNA2    | GMNN     | ATF1     | CHEK2    | POP4     | 0.42  |
| <b>RAD51C</b>   | PSME2    | WRB      | MYCBP    | STMN1    | OXCT1    | 0.106 |
| <b>KIF14</b>    | SMC4     | PLK1     | KIF20A   | GHR      | ITGAE    | 0.143 |
| <b>SLC35A3</b>  | RPL39L   | OXCT1    | SLC35A1  | RB1      | RPS6     | 0.167 |
| <b>AKT1</b>     | SMARCA4  | TMEM109  | RPA1     | TIMELESS | AMDHD2   | 0.128 |
| <b>MUC1</b>     | CAPN1    | THAP11   | GALE     | B4GAT1   | GHR      | 0.583 |
| <b>CASP2</b>    | PGRMC1   | PARP1    | OXCT1    | PAICS    | TBP      | 0.069 |

|                  |          |          |          |         |          |       |
|------------------|----------|----------|----------|---------|----------|-------|
| <b>PARP1</b>     | TIMELESS | ASAH1    | ELAVL1   | OXCT1   | ARHGAP1  | 0.342 |
| <b>FDFT1</b>     | ELOVL6   | EBP      | PCMT1    | BZW2    | TMEM97   | 0.31  |
| <b>CCND1</b>     | MRPL12   | SKP1     | TPM1     | PAICS   | PFKL     | 0.22  |
| <b>OXA1L</b>     | PIP4K2B  | SOX4     | GAA      | BDH1    | NFKBIA   | 0.091 |
| <b>CDC42</b>     | MIF      | PSME1    | NENF     | AKT1    | POP4     | 0.153 |
| <b>ADH5</b>      | PSMD10   | ICAM3    | SKP1     | RPA3    | LYPLA1   | 0.107 |
| <b>CYCS</b>      | POLR2K   | GTF2A2   | TFDP1    | DNAJC15 | DYNLT3   | 0.112 |
| <b>COPS7A</b>    | SMARCD2  | KLHDC2   | CDK2     | RPS6    | FIS1     | 0.203 |
| <b>GLOD4</b>     | HN1L     | SYPL1    | MBNL1    | HDAC2   | XBP1     | 0.104 |
| <b>DLG</b>       | SDHB     | MRPL19   | ANXA7    | IARS2   | CPNE3    | 0.063 |
| <b>IFRD2</b>     | PAICS    | POLR2I   | NUP62    | SDHB    | RUVBL1   | 0.087 |
| <b>TSPAN6</b>    | SCP2     | GTF2A2   | EAPP     | PSME1   | SLC35A1  | 0.207 |
| <b>CDKN1B</b>    | ATF1     | BAMBI    | DDB2     | TBP     | LYPLA1   | 0.046 |
| <b>PRPF4</b>     | SDHB     | TBP      | STUB1    | PARP2   | LSM5     | 0.086 |
| <b>CBR1</b>      | HSD17B10 | SDHB     | POP4     | COG4    | PAICS    | 0.148 |
| <b>NR2F6</b>     | ERBB3    | AURKB    | ELOVL6   | SPDEF   | B4GAT1   | 0.099 |
| <b>TSPAN4</b>    | S100A13  | LAGE3    | ETFB     | GAA     | ENOSF1   | 0.353 |
| <b>PSIP1</b>     | TIMELESS | STMN1    | PDS5A    | MCM3    | HADH     | 0.153 |
| <b>AURKB</b>     | CHEK1    | CISD1    | MYBL2    | PSRC1   | POLE2    | 0.299 |
| <b>RPA3</b>      | MYCBP    | POLR2K   | NRAS     | MPC2    | ICAM3    | 0.223 |
| <b>HDGFRP3</b>   | HDAC2    | PAICS    | NNT      | SCCPDH  | MBNL1    | 0.129 |
| <b>RRS1</b>      | RRP1B    | PAICS    | NUP62    | PSMG1   | AURKA    | 0.11  |
| <b>EED</b>       | USP1     | CDC25A   | YKT6     | HDAC2   | POP4     | 0.218 |
| <b>GATA3</b>     | NET1     | XBP1     | ERBB3    | NUP93   | SOX4     | 0.241 |
| <b>CETN3</b>     | TMEM50A  | POLG2    | DNAJC15  | S100A13 | HADH     | 0.103 |
| <b>TGFB3</b>     | OXCT1    | RB1      | BCL2     | DDR1    | SPDEF    | 0.13  |
| <b>HIST1H2BK</b> | S100A13  | HMG20B   | GHR      | CCDC92  | DYNLT3   | 0.236 |
| <b>ANXA7</b>     | SDHB     | SKP1     | NRAS     | CPNE3   | TBP      | 0.37  |
| <b>PUF60</b>     | NUP88    | RRP1B    | COG4     | BIRC5   | HSD17B10 | 0.074 |
| <b>CFLAR</b>     | NRAS     | RB1      | CHEK1    | AURKB   | SCP2     | 0.177 |
| <b>RPL39L</b>    | SLC35A3  | SKP1     | PRR7     | MYCBP   | RPS6     | 0.152 |
| <b>CHEK2</b>     | CDCA4    | ICAM3    | YKT6     | POLE2   | TIMELESS | 0.228 |
| <b>HMG20B</b>    | AKT1     | CANT1    | RPA1     | AMDHD2  | ICMT     | 0.076 |
| <b>TPM1</b>      | SMARCA4  | EBNA1BP2 | ENOSF1   | TCEAL4  | SCRN1    | 0.256 |
| <b>BDH1</b>      | MCM3     | TIMELESS | B4GAT1   | ICAM3   | ERBB3    | 0.225 |
| <b>LSM5</b>      | POLR2K   | CYCS     | ATG3     | PCMT1   | MRPL19   | 0.117 |
| <b>TXNDC9</b>    | CRYZ     | MPC2     | GTPBP8   | EAPP    | DERA     | 0.098 |
| <b>HN1L</b>      | PGRMC1   | PAICS    | KIAA0100 | NUP62   | DAG1     | 0.223 |
| <b>ZMIZ1</b>     | ARHGAP1  | SCRN1    | VPS28    | KAT6B   | GLOD4    | 0.16  |
| <b>PDS5A</b>     | PCM1     | NNT      | SYNE2    | SMC4    | SCRN1    | 0.208 |
| <b>XPO7</b>      | PCM1     | HEATR1   | ATG3     | HN1L    | MBNL1    | 0.142 |
| <b>COG4</b>      | HSD17B10 | CSK      | ETFB     | LIG1    | CEBPA    | 0.212 |
| <b>TMEM97</b>    | CDCA4    | EBP      | UBE2C    | FDFT1   | MCM3     | 0.174 |
| <b>TFDP1</b>     | MYBL2    | SDHB     | NOLC1    | PAICS   | CDK2     | 0.313 |
| <b>KAT6B</b>     | SYNE2    | EVL      | ZMIZ1    | BCL2    | SLC37A4  | 0.096 |
| <b>ADO</b>       | SMARCA4  | GAA      | PCM1     | SUV39H1 | ATMIN    | 0.123 |
| <b>JADE2</b>     | NUP62    | AURKA    | FAM63A   | TP53    | PIP4K2B  | 0.357 |

|                 |          |          |          |          |          |       |
|-----------------|----------|----------|----------|----------|----------|-------|
| <b>PCCB</b>     | NIPSNAP1 | HMG20B   | PSME1    | ADI1     | STUB1    | 0.101 |
| <b>KIAA1033</b> | ATMIN    | RPS6     | SLC35A1  | ADI1     | TLE1     | 0.049 |
| <b>RRP1B</b>    | SMC4     | SMARCA4  | NOLC1    | EBNA1BP2 | RPIA     | 0.231 |
| <b>THAP11</b>   | RUVBL1   | GHR      | MUC1     | PCMT1    | LBR      | 0.079 |
| <b>C2CD5</b>    | SPDEF    | SLC35A1  | NRIP1    | GATA3    | TOP2A    | 0.273 |
| <b>POLR2I</b>   | MIF      | PAFAH1B3 | ETFB     | SDHB     | IFRD2    | 0.068 |
| <b>RPIA</b>     | TMEM109  | PAICS    | EBNA1BP2 | RUVBL1   | ENOSF1   | 0.161 |
| <b>PLCB3</b>    | SMARCA4  | CCDC92   | ARHGAP1  | TGFB3    | AMDHD2   | 0.198 |
| <b>ASAH1</b>    | PRAF2    | GAA      | OXCT1    | STAT1    | PARP1    | 0.144 |
| <b>SMARCA4</b>  | RPA1     | HSD17B10 | NUP62    | ENOSF1   | RRP1B    | 0.322 |
| <b>ATP5S</b>    | SKP1     | PSME1    | RPA3     | DECR1    | ATF1     | 0.146 |
| <b>PARP2</b>    | USP1     | NUP88    | SMC4     | AURKA    | YKT6     | 0.157 |
| <b>AKR7A2</b>   | S100A13  | CDK2     | PRAF2    | DECR1    | MYCBP    | 0.176 |
| <b>SPDEF</b>    | ELOVL6   | SLC35A1  | XBP1     | ARHGAP1  | TCEAL4   | 0.204 |
| <b>CCNB1</b>    | CCNA2    | AURKA    | MAT2A    | AURKB    | PSRC1    | 0.197 |
| <b>ERBB2</b>    | GAA      | TLE1     | DDB2     | ERBB3    | GAPDH    | 0.217 |
| <b>VDAC1</b>    | EBNA1BP2 | GAPDH    | SDHB     | MYCBP    | CISD1    | 0.06  |
| <b>GAPDH</b>    | DAG1     | TRAP1    | COASY    | CSK      | ATG3     | 0.06  |
| <b>CNDP2</b>    | GAA      | HN1L     | TIMELESS | SMARCC1  | ARHGAP1  | 0.16  |
| <b>ADI1</b>     | MYCBP    | STMN1    | ANXA7    | BDH1     | TFDP1    | 0.095 |
| <b>TMEM50A</b>  | SKP1     | DECR1    | TCEAL4   | KLHDC2   | CDC25B   | 0.316 |
| <b>HACD3</b>    | CISD1    | AURKB    | HADH     | RB1      | TFDP1    | 0.147 |
| <b>YKT6</b>     | BIRC5    | UBE2C    | AURKA    | CCNF     | TIMELESS | 0.433 |
| <b>BZW2</b>     | SKP1     | PRR7     | TSTA3    | PSME1    | FDFT1    | 0.152 |
| <b>EVL</b>      | PAFAH1B3 | AMDHD2   | GAA      | NNT      | BCL2     | 0.152 |
| <b>MIF</b>      | PSME1    | SKP1     | BIRC5    | LAGE3    | MRPL12   | 0.278 |
| <b>IARS2</b>    | TIMELESS | ICMT     | PCMT1    | CDK4     | WRB      | 0.18  |
| <b>KLHDC2</b>   | SLC35A1  | ERBB3    | HES1     | CCDC92   | BAMBI    | 0.372 |
| <b>STUB1</b>    | HSD17B10 | AKT1     | CHMP4A   | PAFAH1B3 | HMG20B   | 0.118 |
| <b>ENOPH1</b>   | SDHB     | ATG3     | PSMG1    | PAICS    | SMC4     | 0.101 |
| <b>MRPS2</b>    | MRPL12   | TMEM109  | CSK      | RRP1B    | NUP88    | 0.058 |
| <b>NUP85</b>    | TIMELESS | MCM3     | TMEM109  | PARP2    | EZH2     | 0.141 |
| <b>FIS1</b>     | TSPAN6   | HMG20B   | EML3     | KLHDC2   | COPS7A   | 0.111 |
| <b>NUSAP1</b>   | TOP2A    | CDK1     | DERA     | CDK2     | CDC45    | 0.219 |
| <b>MRPS16</b>   | ICAM3    | LAGE3    | CDK4     | PSME1    | ATP5S    | 0.224 |
| <b>NPDC1</b>    | GAA      | TSTA3    | CTSD     | EVL      | EML3     | 0.212 |
| <b>DERA</b>     | GMNN     | CDK2     | NUSAP1   | CDC45    | MPC2     | 0.104 |
| <b>UBR7</b>     | PCMT1    | SMC4     | USP1     | CDCA4    | CCP110   | 0.109 |
| <b>ISOC1</b>    | MPC2     | GHR      | TIMELESS | ELOVL6   | IARS2    | 0.202 |
| <b>CCDC92</b>   | GAA      | RRAGA    | PLCB3    | HES1     | GHR      | 0.163 |
| <b>SCAND1</b>   | DDB2     | TCEAL4   | HSPB1    | PSME1    | CIRBP    | 0.169 |
| <b>ZDHHC6</b>   | PAICS    | EZH2     | TFDP1    | PCMT1    | PARP2    | 0.186 |
| <b>TIMM9</b>    | ATF1     | POLE2    | NUP62    | XBP1     | TSEN2    | 0.122 |
| <b>GMNN</b>     | POLE2    | BIRC5    | GTF2A2   | RPA3     | AURKB    | 0.348 |
| <b>CDCA4</b>    | USP1     | CHEK2    | CCNF     | LAGE3    | ICAM3    | 0.331 |
| <b>NENF</b>     | PSME1    | TSTA3    | TSEN2    | CDC42    | OXCT1    | 0.292 |
| <b>DNAJC15</b>  | CRYZ     | GTF2A2   | RPA3     | CETN3    | POLR2K   | 0.2   |

|                |          |          |         |          |          |       |
|----------------|----------|----------|---------|----------|----------|-------|
| <b>HEBP1</b>   | SPDEF    | GHR      | CIRBP   | ARHGAP1  | TCEAL4   | 0.111 |
| <b>CD320</b>   | EBNA1BP2 | SDHB     | SMARCA4 | HSD17B10 | PGRMC1   | 0.084 |
| <b>CHMP4A</b>  | TPM1     | SMARCA4  | PCMT1   | TCEAL4   | CISD1    | 0.14  |
| <b>HEATR1</b>  | XPO7     | SMARCC1  | SCYL3   | NOLC1    | SOX4     | 0.171 |
| <b>CISD1</b>   | CCNH     | AURKB    | BDH1    | RB1      | SLC35A3  | 0.288 |
| <b>SUV39H1</b> | AURKA    | CDC25A   | YKT6    | BRCA1    | ADO      | 0.197 |
| <b>VPS28</b>   | ENOSF1   | SLC35A3  | SMARCC1 | ZMIZ1    | SYNE2    | 0.114 |
| <b>KIF20A</b>  | CCNA2    | AURKA    | BIRC5   | SMC4     | TOP2A    | 0.244 |
| <b>METRNL</b>  | AKT1     | PRR7     | MYCBP   | MELK     | NUDCD3   | 0.092 |
| <b>LAGE3</b>   | ICAM3    | PAFAH1B3 | MYCBP   | MRPS16   | S100A13  | 0.242 |
| <b>PXMP2</b>   | PSME1    | S100A13  | MYCBP   | OXCT1    | TIMELESS | 0.102 |
| <b>AMDHD2</b>  | GAA      | PAFAH1B3 | GALE    | HSPB1    | CCDC92   | 0.2   |
| <b>FBXO11</b>  | CASP2    | CHEK1    | HADH    | RHOA     | MCM3     | 0.051 |
| <b>MTERF3</b>  | POLE2    | TSEN2    | CCNA2   | SLC35A1  | POLR2K   | 0.141 |
| <b>PSMD10</b>  | SKP1     | NRAS     | HDAC2   | RHOA     | ADH5     | 0.218 |
| <b>TSEN2</b>   | TMEM109  | MRPL19   | CDC25A  | MAT2A    | MRPL12   | 0.119 |
| <b>PRR7</b>    | TSTA3    | NUDCD3   | ENOSF1  | SDHB     | CISD1    | 0.151 |
| <b>GTPBP8</b>  | CRYZ     | TIMM9    | SLC35A1 | CYCS     | TXNDC9   | 0.065 |
| <b>DENND2D</b> | DDB2     | INPP4B   | DECR1   | SCRN1    | SYPL1    | 0.152 |
| <b>ARPP19</b>  | NRAS     | CEBPA    | RPS6    | ATF1     | CBR1     | 0.109 |
| <b>ATG3</b>    | CCNH     | EBNA1BP2 | EZH2    | POLR2K   | ENOPH1   | 0.093 |
| <b>WDR61</b>   | MYCBP    | ATP5S    | RPA3    | POP4     | CRYZ     | 0.27  |
| <b>CANT1</b>   | KIF20A   | HMG20B   | TLE1    | MRPS2    | NUP62    | 0.088 |
| <b>FAM63A</b>  | NNT      | DDB2     | GATA3   | DDR1     | TCEAL4   | 0.217 |
| <b>ATF1</b>    | NRAS     | SLC35A1  | POLE2   | TBP      | USP1     | 0.191 |
| <b>TSTA3</b>   | ETFB     | GAA      | MYCBP   | TRAP1    | COG4     | 0.153 |

<sup>1</sup>University of Manchester, Department of Computer Science, Manchester, UK.

<sup>2</sup>Taif University, Department of Computer Science, Taif, Saudi Arabia.

<sup>3</sup>Department of Chemical Engineering and Biotechnology, University of Cambridge.

<sup>4</sup>Department of Biology and Biological Engineering Chalmers University of Technology, Sweden.

<sup>5</sup>Alan Turing Institute, NW1 2DB, London, UK.
